# Supplementary material for: Ru(ii)arene(N^N bpy/phen)-based RAPTA complexes for in vitro anti-tumour activity in human glioblastoma cancer cell lines and in vivo toxicity studies in a zebrafish model
Source: Royal Society of Chemistry journal article supplement (doi:10.1039/d2ra02677e), 2022-01-01
Supplement: d2ra02677e1.pdf [file d2ra02677e1.pdf]

## Supporting Information

### **Ru(II)arene(N<sup>^</sup>N bpy/phen) based RAPTA complexes for *in vitro* anti-tumor activity in human glioblastoma cancer cell lines and *in vivo* toxicity study in zebrafish model<sup>†</sup>**

Anuja P K, Binoy Kar, Nilmadhab Roy, Priyankar Paira\*

---

*Department of Chemistry, School of advanced sciences, Vellore Institute of Technology Vellore-632014, Tamilnadu, India, E-mail: [priyankar.paira@vit.ac.in](mailto:priyankar.paira@vit.ac.in)*

---

|                                                                                       |                |
|---------------------------------------------------------------------------------------|----------------|
| <b>Fig.S1-S5,</b>                                                                     |                |
| <b>Table S1-S3.....</b>                                                               | <b>2 - 6</b>   |
| <b><sup>1</sup>H, <sup>13</sup>C, <sup>19</sup>F, <sup>31</sup>P NMR Spectra.....</b> | <b>7 - 20</b>  |
| <b>FT-IR Spectra.....</b>                                                             | <b>21 - 23</b> |
| <b>HLPC .....</b>                                                                     | <b>24 - 27</b> |
| <b>ESI-MS .....</b>                                                                   | <b>28 - 31</b> |
| <b>Experimental Section .....</b>                                                     | <b>32 - 35</b> |
| <b>References .....</b>                                                               | <b>35 - 36</b> |

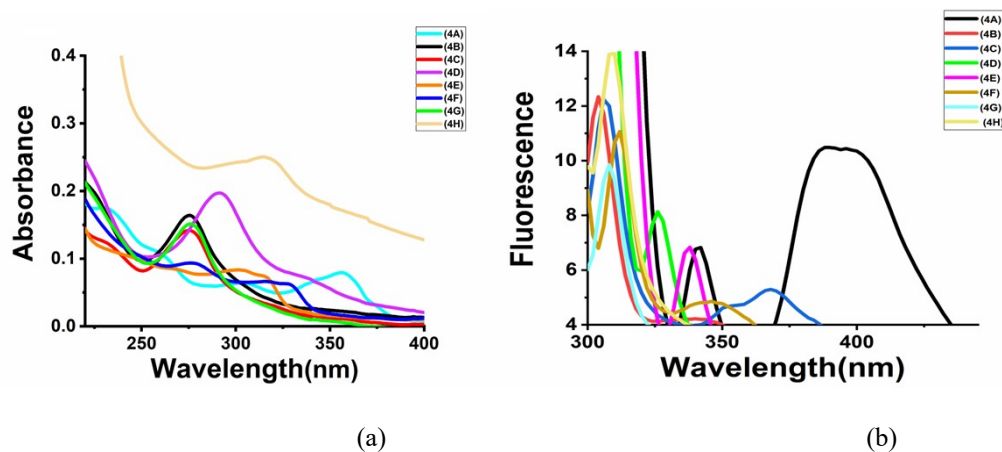

**Fig. S1** (a) Absorption and (b) Emission Spectral Responses of Ru(II)-arene PTA Complexes (**4a-4h**) in DMSO-water (1:9, v/v) media

**Table S1** Physicochemical characterization of RAPTA complexes (**4a-4h**)

| Samples                 | stokes shift | OD <sup>a</sup> | $\epsilon$ (M <sup>-1</sup> cm <sup>-1</sup> ) <sup>b</sup> | $(\phi_f)$ <sup>c</sup> | solubility (M) <sup>d</sup> | log P <sup>e</sup> | Conductivity ( $\Delta_M$ ) ( $\mu\text{S}/\text{cm}$ ) <sup>f</sup> |             |
|-------------------------|--------------|-----------------|-------------------------------------------------------------|-------------------------|-----------------------------|--------------------|----------------------------------------------------------------------|-------------|
|                         |              |                 |                                                             |                         |                             |                    | DMSO                                                                 | 10% aq DMSO |
| <b>4a</b>               | 44           | 0.03            | 3000                                                        | 0.014                   | 0.021                       | 0.49±0.03          | 72                                                                   | 74          |
| <b>4b</b>               | 42           | 0.04            | 4000                                                        | 0.002                   | 0.007                       | 1.2±0.07           | 74                                                                   | 78          |
| <b>4c</b>               | 41           | 0.07            | 7000                                                        | 0.10                    | 0.018                       | 0.30±0.04          | 76                                                                   | 78          |
| <b>4d</b>               | 74           | 0.08            | 8000                                                        | 0.010                   | 0.018                       | 0.55±0.06          | 74                                                                   | 77          |
| <b>4e</b>               | 65           | 0.04            | 4000                                                        | 0.033                   | 0.006                       | 1.4±0.08           | 75                                                                   | 76          |
| <b>4f</b>               | 63           | 0.04            | 4000                                                        | 0.081                   | 0.017                       | 0.33±0.03          | 75                                                                   | 77          |
| <b>4g</b>               | 40           | 0.1             | 10000                                                       | 0.003                   | 0.024                       | 0.48±0.05          | 72                                                                   | 74          |
| <b>4h</b>               | 38           | 0.02            | 2000                                                        | 0.008                   | 0.008                       | 1.0±0.06           | 71                                                                   | 77          |
| <b>Quinine Sulphate</b> | 102          | 0.064           | 6400                                                        | 0.546                   | -                           | -                  | -                                                                    | -           |

<sup>a</sup>optical density, <sup>b</sup>extinction coefficient, <sup>c</sup>quantum yield, <sup>d</sup>DMSO-10% DMEM medium (1:99 v/v, comparable to cell media), <sup>e</sup>Partition Coefficients in n-Octanol/Water, <sup>f</sup>conductance in DMSO and 10% DMSO ( $3 \times 10^{-5}$  M)

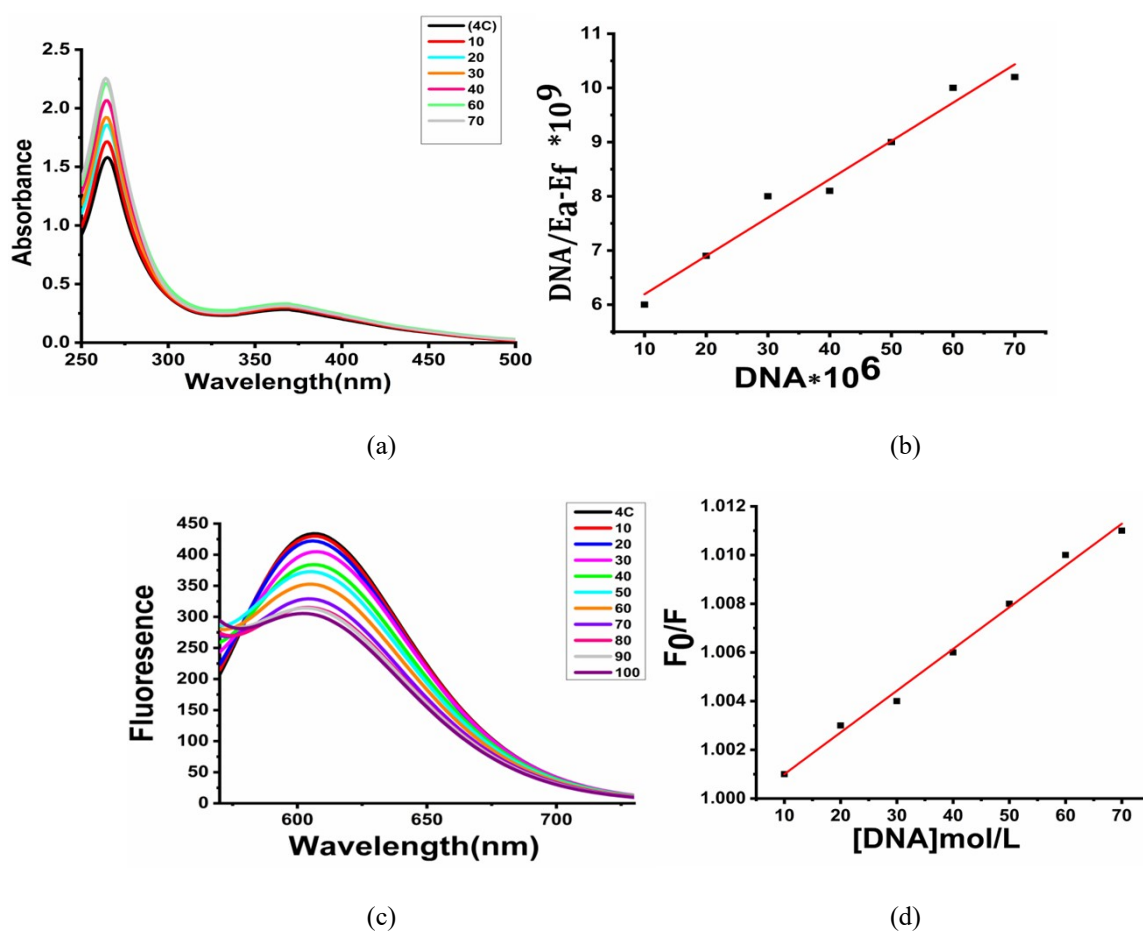

**Fig. S2** (a) and (b) UV-Visible spectral responses of RAPTA complex, **4c** (1x10<sup>-5</sup> M) in 5 mM Tris-HCl-NaCl (pH, 7.2) with incremental accumulation of Ct-DNA (5x10<sup>-5</sup> M); (c) and (d) Responses of fluorescence from EtBr bound DNA in the occurrence of complex **4c** (pH 7.2)

**Table S2** Binding parameters for interaction of complex **4c** with Ct-DNA

| Complex   | Change in absorbance | $\Delta\varepsilon$ (%) <sup>a</sup> | $K_b$ ( $\times 10^5$ M <sup>-1</sup> ) <sup>b</sup> | $K_{sv}$ ( $\times 10^4$ M <sup>-1</sup> ) <sup>c</sup> | $K_{app}$ ( $\times 10^6$ M <sup>-1</sup> ) <sup>d</sup> |
|-----------|----------------------|--------------------------------------|------------------------------------------------------|---------------------------------------------------------|----------------------------------------------------------|
| <b>4c</b> | Hyperchromism        | 50                                   | 1.38 $\pm$ 0.28                                      | 0.018                                                   | 1.38                                                     |

<sup>a</sup>% of hyperchromism/hypochromism, <sup>b</sup> $K_b$ , intrinsic DNA binding constant from UV-visible absorption titration, <sup>c</sup> $K_{sv}$ , Stern-Volmer quenching constant, <sup>d</sup> $K_{app}$ , apparent DNA binding constant from competitive displacement from fluorescence spectroscopy.

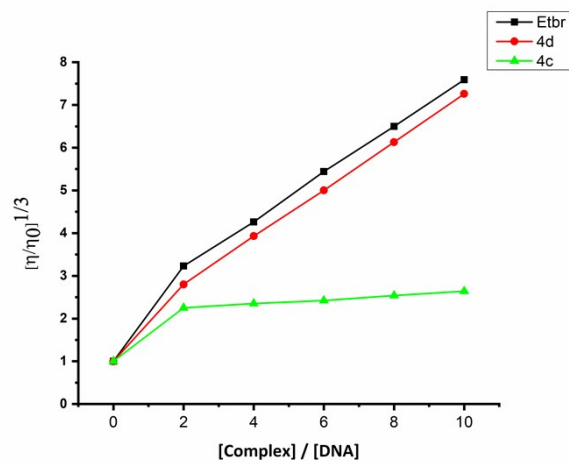

**Fig. S3** Effect of Increasing Amounts of complex **4c** and **4d** on the Viscosity of Ct-DNA at 298 K ( $[\text{EtBr}] = 1 \times 10^{-6} \text{ M}$ ,  $[\text{DNA}] = 1 \times 10^{-6} \text{ M}$ ,  $[\text{complex}] = 1 \times 10^{-3} \text{ M}$ )

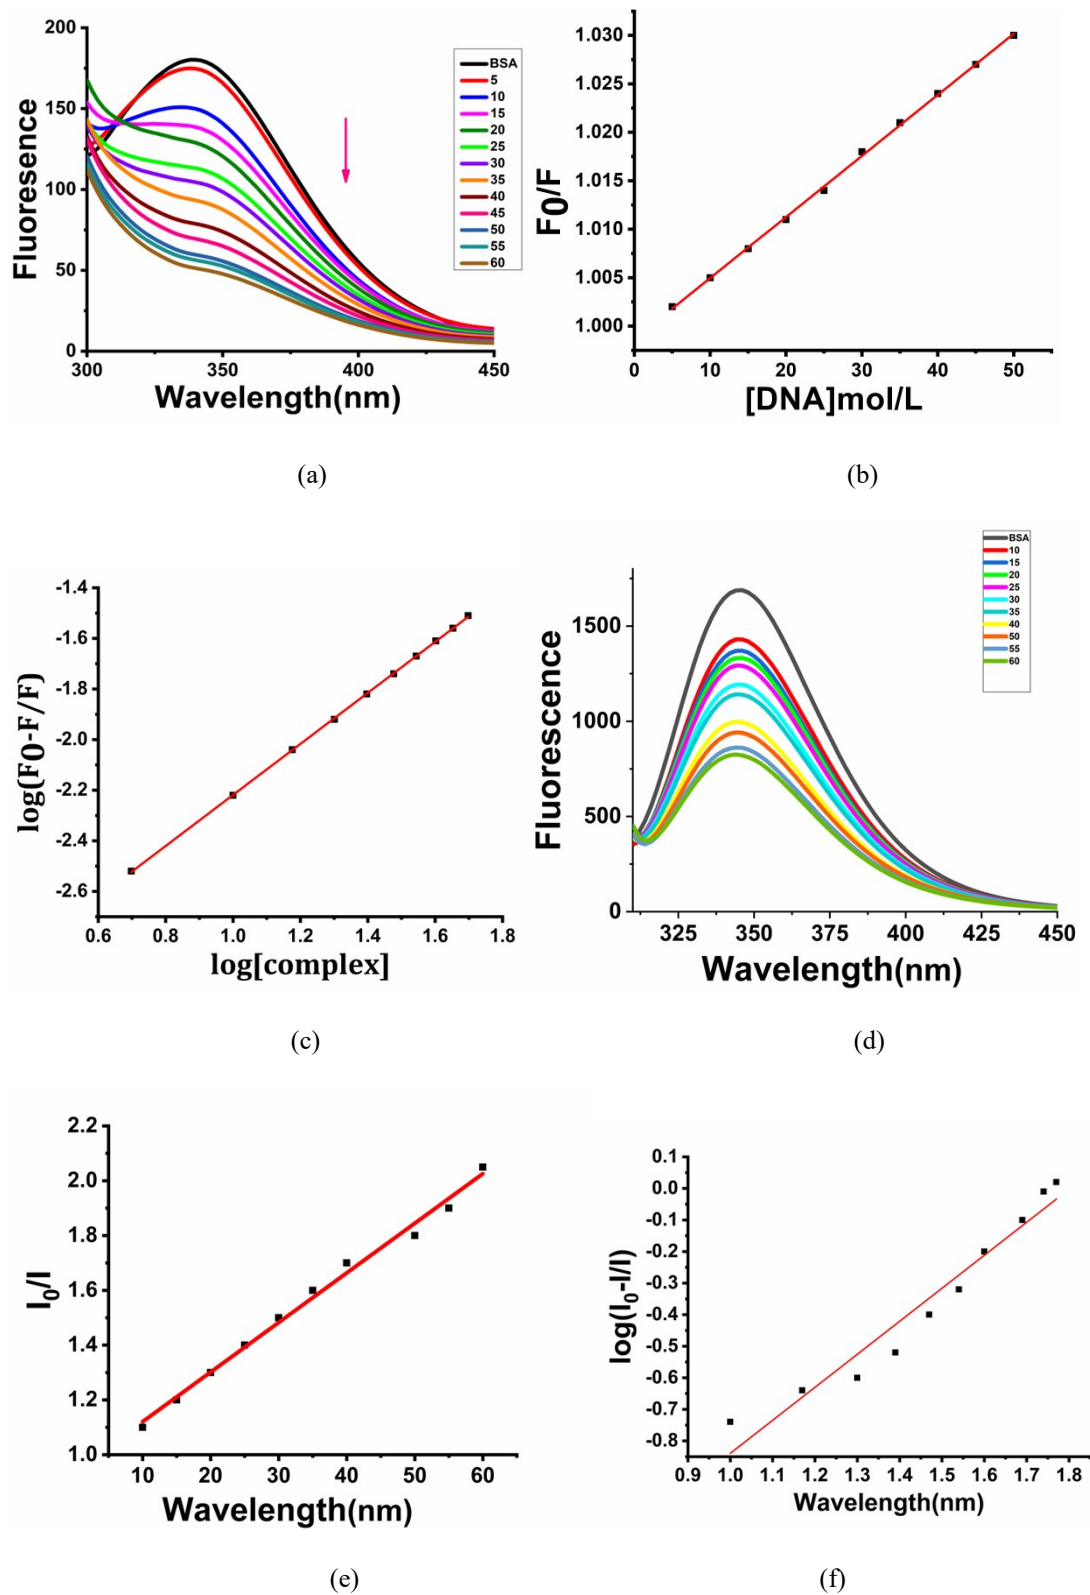

**Fig. S4** Fluorescence Quenching of BSA on Addition of complex **4c** and **4d** in 5 mM TrisHCl/NaCl Buffer (pH 7.2)

**Table S3.** Binding Parameters of Ligand and Ru(II) Complexes with BSA

| Complex   | $K_{BSA}$ ( $M^{-1}$ ) <sup>a</sup> | $k_q$ ( $M^{-1} s^{-1}$ ) <sup>b</sup> | $K$ ( $M^{-1}$ ) <sup>c</sup> | $n^d$ |
|-----------|-------------------------------------|----------------------------------------|-------------------------------|-------|
| <b>4c</b> | $6.3 \times 10^6$                   | $6.3 \times 10^{14}$                   | $6.02 \times 10^4$            | 1     |
| <b>4d</b> | $1.8 \times 10^6$                   | $1.8 \times 10^{14}$                   | $5.25 \times 10^4$            | 1     |

<sup>a</sup> $K_{BSA}$ , Stern Volmer quenching constant; <sup>b</sup> $k_q$ , quenching rate constant (BSA); <sup>c</sup> $K$ , binding constant with BSA; <sup>d</sup> $n$ , number of binding sites (BSA). Concentrations of complexes = 0–60  $\mu M$  in distilled water, BSA concentration was fixed at 5  $\mu M$ .

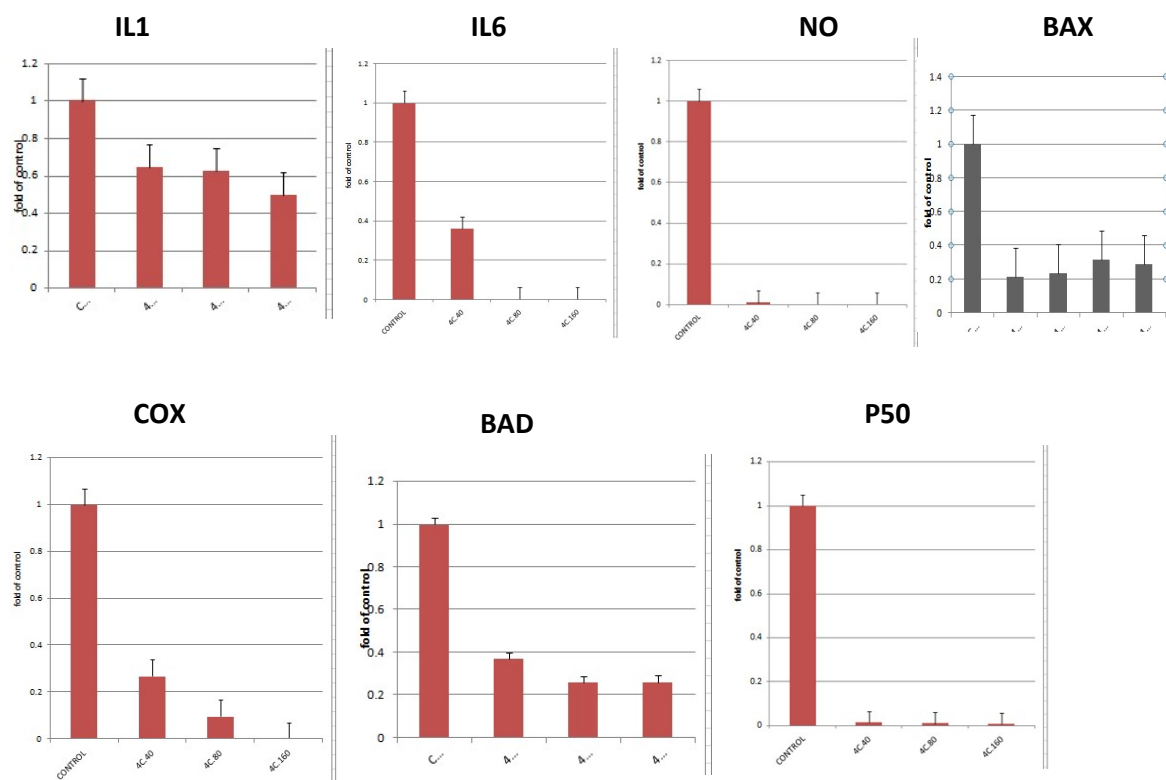

**Fig. S5** RT-PCR study of complex **4c** against U87MG

# Characterization of the RAPTA complexes

## <sup>1</sup>H NMR of 4a

Signature SIF VIT VELLORE  
4a

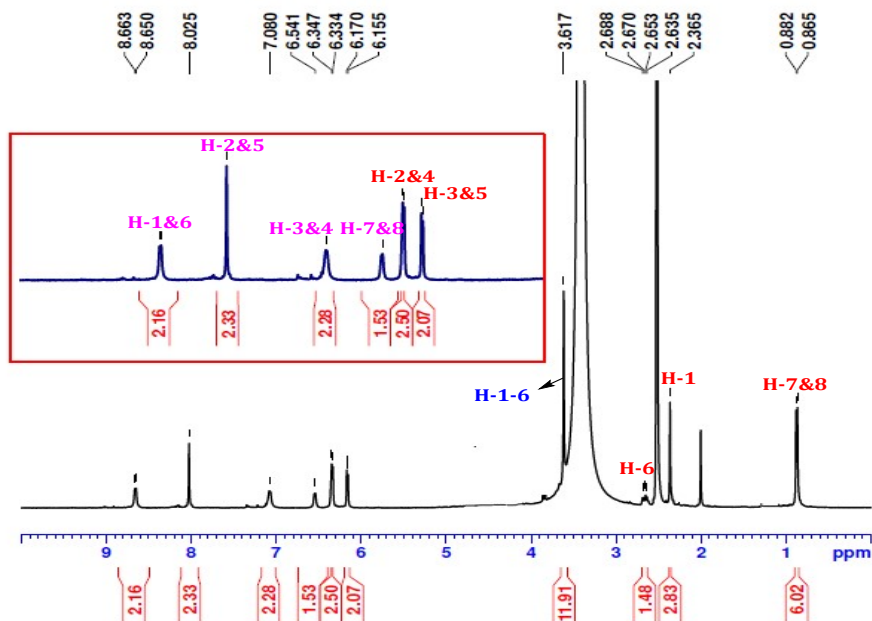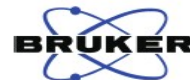

Current Data Parameters  
NAME New folder  
EXPNO 36  
PROCNO 1

F2 - Acquisition Parameters  
Date\_ 20180123  
Time 10.38 h  
INSTRUM spect  
PROBHD Z108618\_0505 (  
PULPROG zg30  
TD 65536  
SOLVENT DMSO  
NS 64  
DS 2  
SWH 8012.820 Hz  
FIDRES 0.244532 Hz  
AQ 4.0894465 sec  
RG 127.79  
DW 62.400 usec  
DE 6.50 usec  
TE 296.9 K  
D1 1.00000000 sec  
TD0 1  
SFO1 400.2604716 MHz  
NUC1 1H  
P1 14.25 usec  
PLW1 14.00000000 W

F2 - Processing parameters  
SI 65536  
SF 400.2579946 MHz  
WDW EM  
SSB 0  
LB 0.30 Hz  
GB 0  
PC 1.00

## <sup>13</sup>C NMR of 4a

Signature SIF VIT VELLORE  
4a

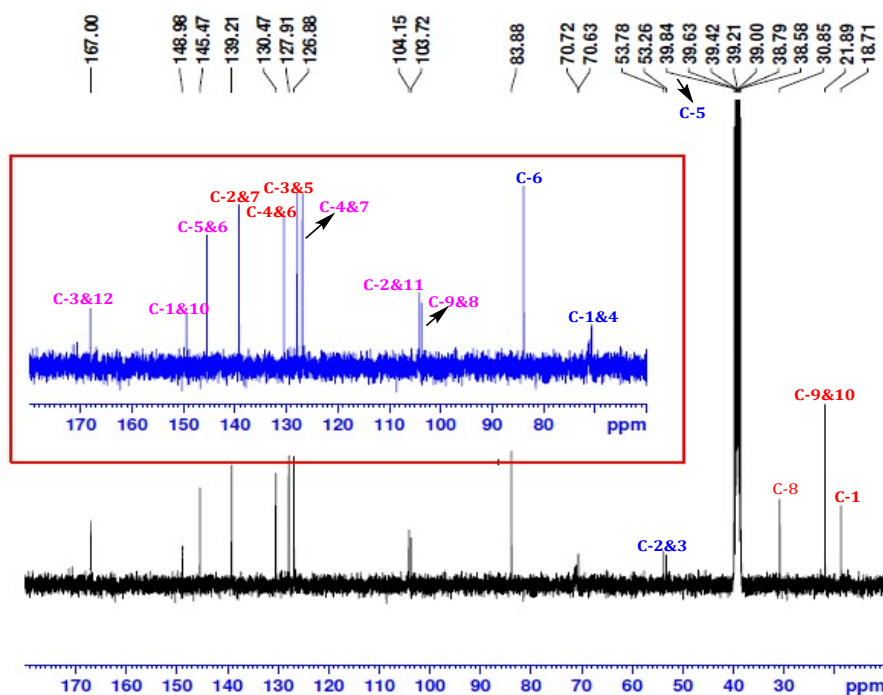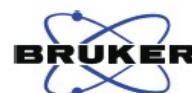

Current Data Parameters  
NAME ann  
EXPNO 70  
PROCNO 4

F2 - Acquisition Parameters  
Date\_ 20200124  
Time 19.08 h  
INSTRUM spect  
PROBHD Z108618\_0505 (  
PULPROG zgpg30  
TD 65536  
SOLVENT DMSO  
NS 512  
DS 4  
SWH 24038.461 Hz  
FIDRES 0.733596 Hz  
AQ 1.3631488 sec  
RG 199.6  
DW 20.800 usec  
DE 6.50 usec  
TE 296.8 K  
D1 2.00000000 sec  
D11 0.03000000 sec  
TD0 1  
SFO1 100.6550186 MHz  
NUC1 13C  
P1 9.80 usec  
PLW1 58.00000000 W  
SFO2 400.2596010 MHz  
NUC2 1H  
CPCPRG2 waltz16  
PCPD2 90.00 usec  
PLW2 16.00000000 W  
PLW12 0.38716000 W  
PLW13 0.19474000 W

F2 - Processing parameters  
SI 32768  
SF 100.6449542 MHz  
WDW EM  
SSB 0  
LB 1.00 Hz  
GB 0  
PC 1.40

# <sup>19</sup>F NMR of 4a

Signature SIF VIT VELLORE  
4a

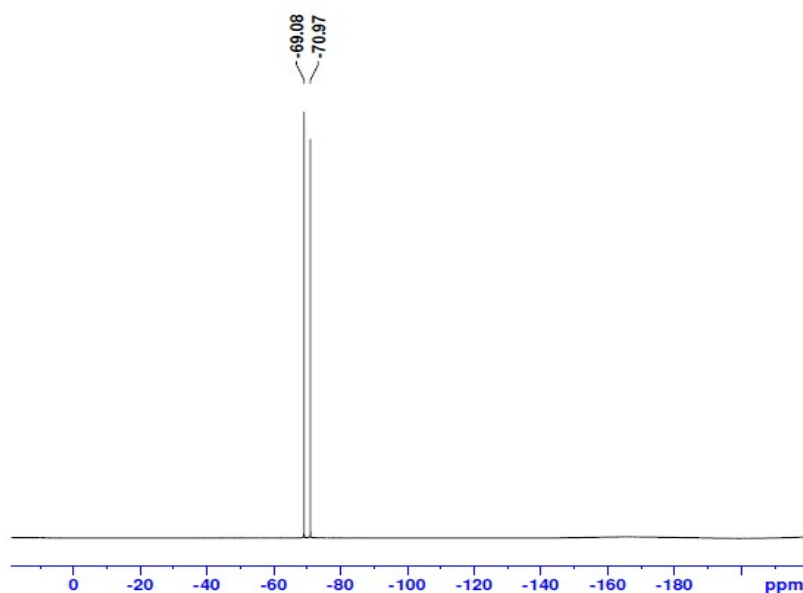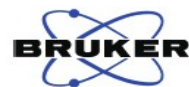

Current Data Parameters  
NAME for nmr data  
EXPNO 7  
PROCNO 1

F2 - Acquisition Parameters  
Date\_ 20180815  
Time 11.50 h  
INSTRUM spect  
PROBHD Z108618\_0505 (  
PULPROG zgfglgn  
TD 131072  
SOLVENT DMSO  
NS 16  
DS 4  
SWH 89285.711 Hz  
FIDRES 1.362392 Hz  
AQ 0.7340032 sec  
RG 199.6  
DW 5.600 usec  
DE 6.50 usec  
TE 297.2 K  
D1 1.00000000 sec  
TD0 1  
SFO1 376.5811447 MHz  
NUC1 19F  
P1 14.75 usec  
PLW1 19.00000000 W

F2 - Processing parameters  
SI 65536  
SF 376.6188065 MHz  
WDW EM  
SSB 0  
LB 0.30 Hz  
GB 0  
PC 1.00

# <sup>31</sup>P NMR of 4a

Signature SIF VIT VELLORE  
4a

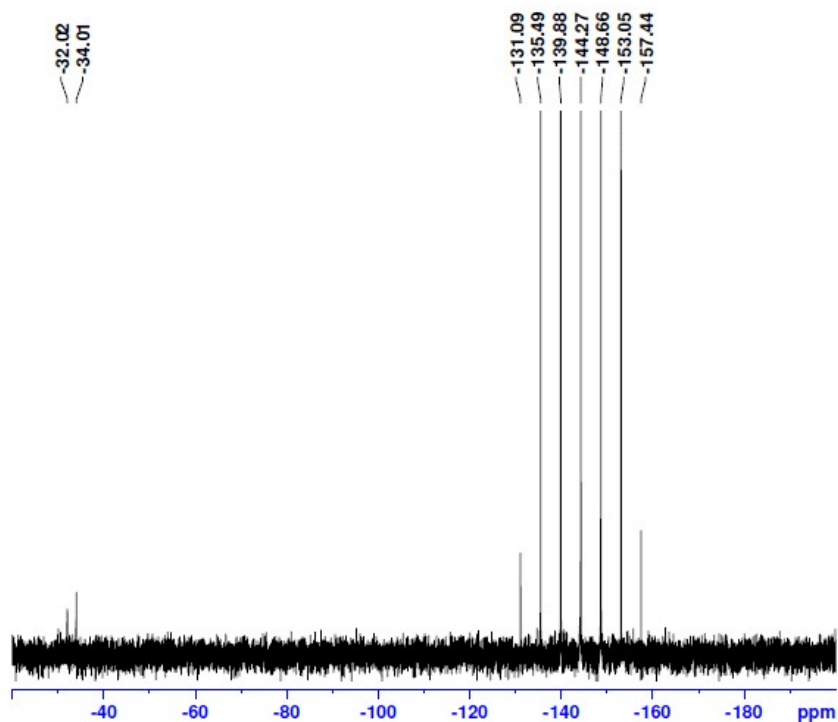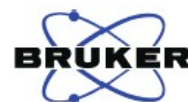

Current Data Parameters  
NAME for nmr data  
EXPNO 6  
PROCNO 1

F2 - Acquisition Parameters  
Date\_ 20180815  
Time 11.31 h  
INSTRUM spect  
PROBHD Z108618\_0505 (  
PULPROG zg30  
TD 65536  
SOLVENT DMSO  
NS 32  
DS 4  
SWH 64102.563 Hz  
FIDRES 1.956255 Hz  
AQ 0.5111808 sec  
RG 199.6  
DW 7.800 usec  
DE 6.50 usec  
TE 297.1 K  
D1 2.00000000 sec  
TD0 1  
SFO1 162.0193069 MHz  
NUC1 31P  
P1 14.50 usec  
PLW1 15.00000000 W

F2 - Processing parameters  
SI 32768  
SF 162.0274083 MHz  
WDW EM  
SSB 0  
LB 1.00 Hz  
GB 0  
PC 1.40



# <sup>1</sup>H NMR of 4b

Signature SIF VIT VELLORE  
4b

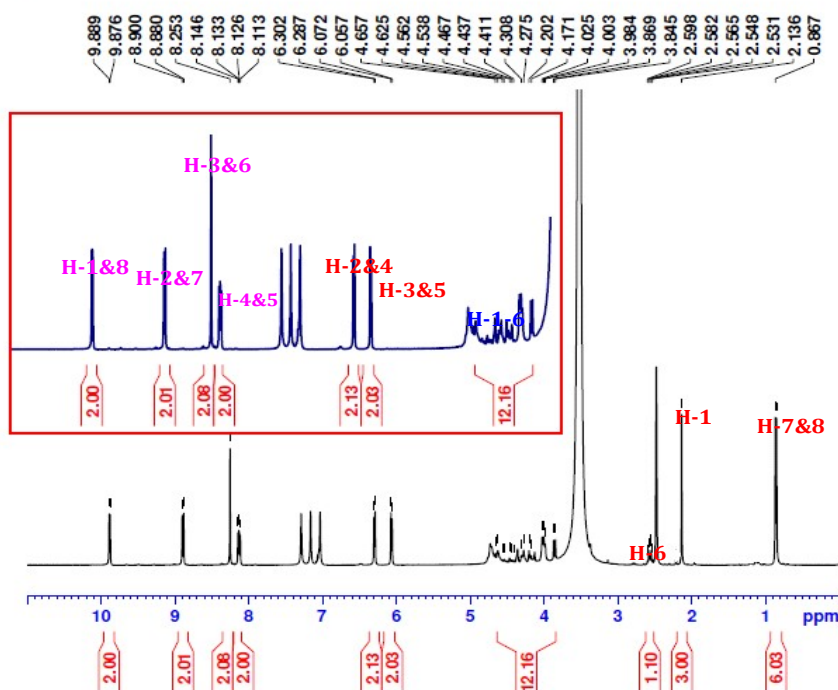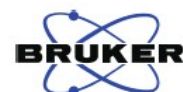

Current Data Parameters  
NAME 3b-h1,f19 p31 nmr  
EXPNO 3  
PROCNO 1

F2 - Acquisition Parameters  
Date\_ 20180202  
Time 19.31 h  
INSTRUM spect  
PROBHD Z108618\_0505 (Zgpg30)  
PULPROG zg30  
TD 65536  
SOLVENT DMSO  
NS 16  
DS 2  
SWH 8012.820 Hz  
FIDRES 0.244532 Hz  
AQ 4.0894465 sec  
RG 35.49  
DW 62.400 usec  
DE 6.50 usec  
TE 296.9 K  
D1 1.00000000 sec  
TDO 1  
SFO1 400.2604716 MHz  
NUC1 1H  
P1 14.25 usec  
PLW1 14.00000000 W

F2 - Processing parameters  
SI 65536  
SF 400.2580119 MHz  
WDW EM  
SSB 0  
LB 0.30 Hz  
GB 0  
PC 1.00

# <sup>13</sup>C NMR of 4b

Signature SIF VIT VELLORE  
4b

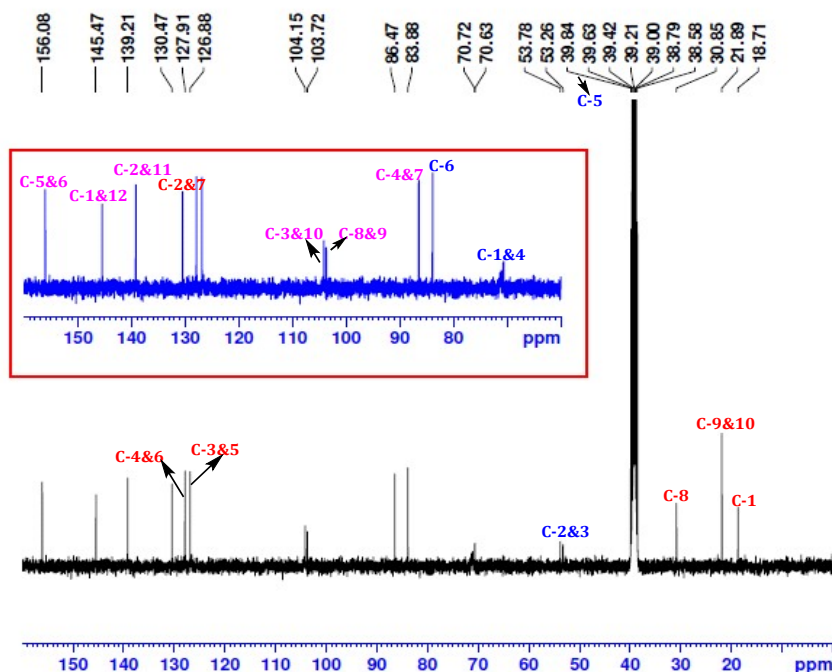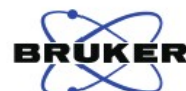

Current Data Parameters  
NAME anh  
EXPNO 69  
PROCNO 1

F2 - Acquisition Parameters  
Date\_ 20200124  
Time 18.08 h  
INSTRUM spect  
PROBHD Z108618\_0505 (Zgpg30)  
PULPROG zgpg30  
TD 65536  
SOLVENT DMSO  
NS 512  
DS 4  
SWH 24038.461 Hz  
FIDRES 0.733596 Hz  
AQ 1.3631488 sec  
RG 199.6  
DW 20.800 usec  
DE 6.50 usec  
TE 296.9 K  
D1 2.00000000 sec  
D11 0.03000000 sec  
TDO 1  
SFO1 100.6250186 MHz  
NUC1 13C  
P1 9.80 usec  
PLW1 58.00000000 W  
SFO2 400.2596010 MHz  
NUC2 1H  
CPDPRG12 waltz16  
PCPD2 90.00 usec  
PLW2 16.00000000 W  
PLW12 0.38716000 W  
PLW13 0.19474000 W

F2 - Processing parameters  
SI 32768  
SF 100.6449542 MHz  
WDW EM  
SSB 0  
LB 1.00 Hz  
GB 0  
PC 1.40

# <sup>19</sup>F NMR of 4b

Signature SIF VIT VELLORE  
4b

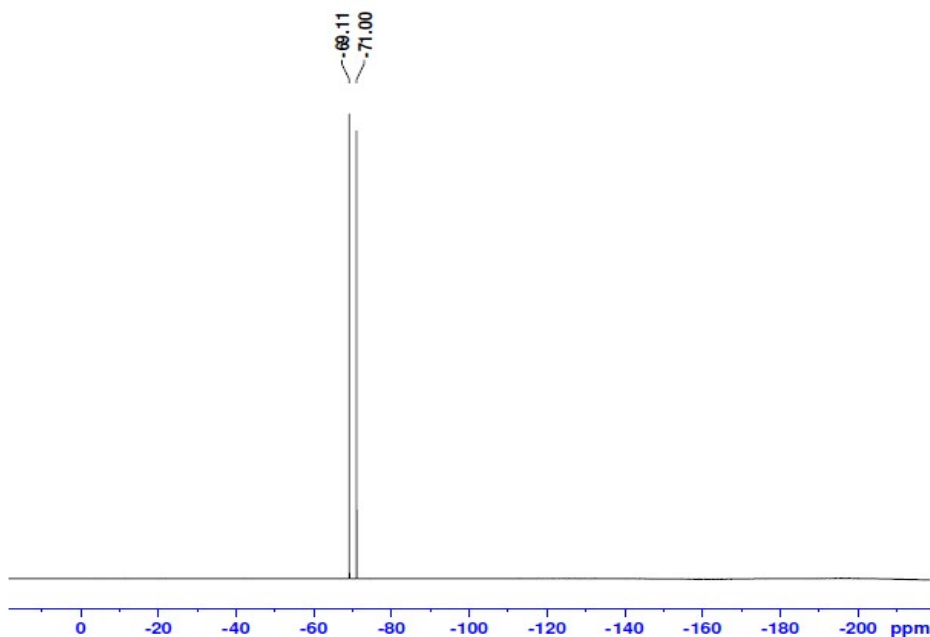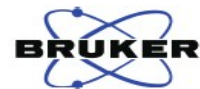

Current Data Parameters  
NAME 3b'-h1,f19 p31 nmr  
EXPNO 5  
PROCNO 1

F2 - Acquisition Parameters  
Date\_ 20180202  
Time 19.35 h  
INSTRUM spect  
PROBHD Z108618\_0505 (  
PULPROG zgfgqn  
TD 131072  
SOLVENT DMSO  
NS 16  
DS 4  
SWH 89285.711 Hz  
FIDRES 1.362392 Hz  
AQ 0.7340032 sec  
RG 199.6  
DW 5.600 usec  
DE 6.50 usec  
TE 296.8 K  
D1 1.0000000 sec  
TD0 1  
SFO1 376.5811447 MHz  
NUC1 19F  
P1 14.75 usec  
PLW1 19.00000000 W

F2 - Processing parameters  
SI 65536  
SF 376.6188065 MHz  
EM  
WDW 0  
SSB 0  
LB 0.30 Hz  
GB 0  
PC 1.00

# <sup>31</sup>P NMR of 4b

Signature SIF VIT VELLORE  
4b

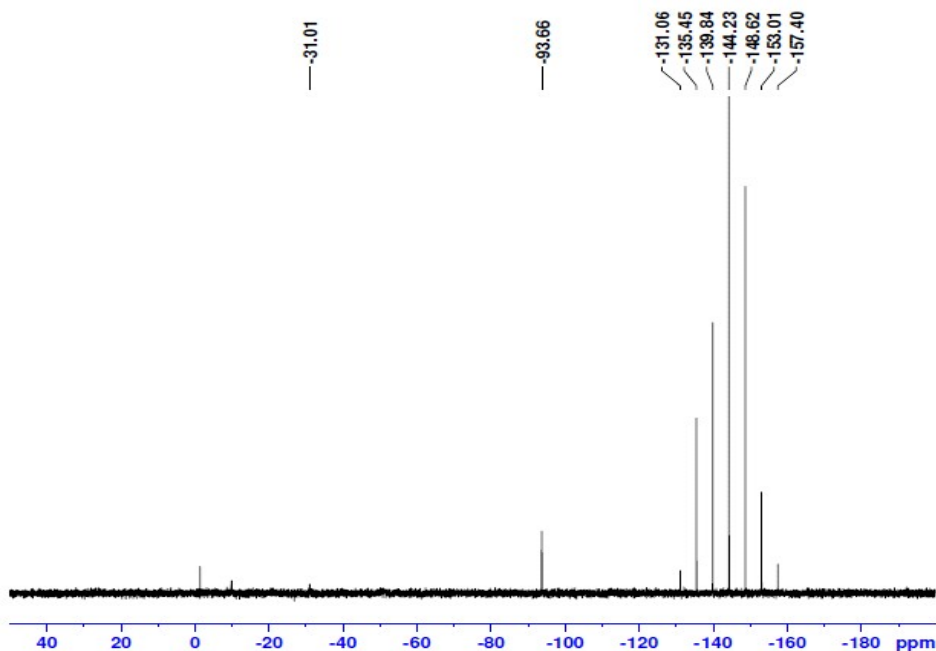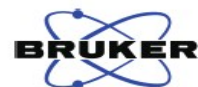

Current Data Parameters  
NAME 3b'-h1,f19 p31 nmr  
EXPNO 4  
PROCNO 1

F2 - Acquisition Parameters  
Date\_ 20180202  
Time 19.33 h  
INSTRUM spect  
PROBHD Z108618\_0505 (  
PULPROG zg30  
TD 65536  
SOLVENT DMSO  
NS 32  
DS 4  
SWH 64102.563 Hz  
FIDRES 1.956255 Hz  
AQ 0.5111808 sec  
RG 199.6  
DW 7.800 usec  
DE 6.50 usec  
TE 296.8 K  
D1 2.0000000 sec  
TD0 1  
SFO1 162.0193069 MHz  
NUC1 31P  
P1 14.50 usec  
PLW1 15.00000000 W

F2 - Processing parameters  
SI 32768  
SF 162.0274083 MHz  
EM  
WDW 0  
SSB 0  
LB 1.00 Hz  
GB 0  
PC 1.40

# <sup>1</sup>H NMR of 4c

Signature SIF VIT VELLORE  
4c

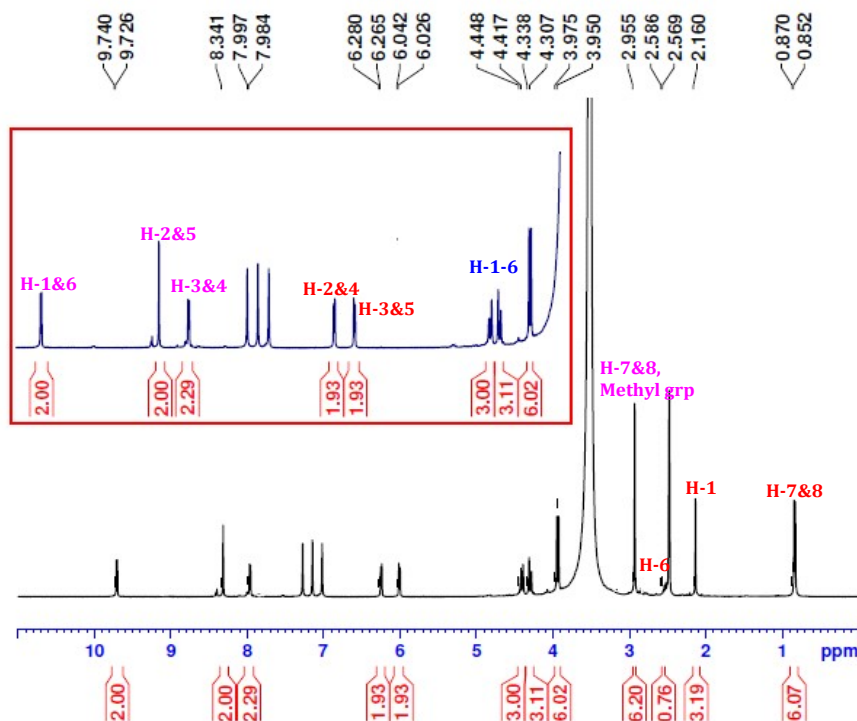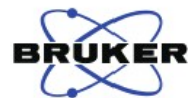

Current Data Parameters  
NAME 40  
EXPNO 15  
PROCNO 1

F2 - Acquisition Parameters  
Date\_ 20180514  
Time 21.25 h  
INSTRUM spect  
PROBHD Z108618\_0505 (  
PULPROG zg30  
TD 65536  
SOLVENT DMSO  
NS 16  
DS 2  
SWH 8012.820 Hz  
FIDRES 0.244532 Hz  
AQ 4.0894465 sec  
RG 35.49  
DW 62.400 usec  
DE 6.50 usec  
TE 299.9 K  
D1 1.00000000 sec  
TD0 1  
SFO1 400.2604716 MHz  
NUC1 1H  
P1 14.27 usec  
PLW1 15.00000000 W

F2 - Processing parameters  
SI 65536  
SF 400.2580124 MHz  
WDW EM  
SSB 0  
LB 0.30 Hz  
GB 0  
PC 1.00

# <sup>13</sup>C NMR of 4c

Signature SIF VIT VELLORE  
4c

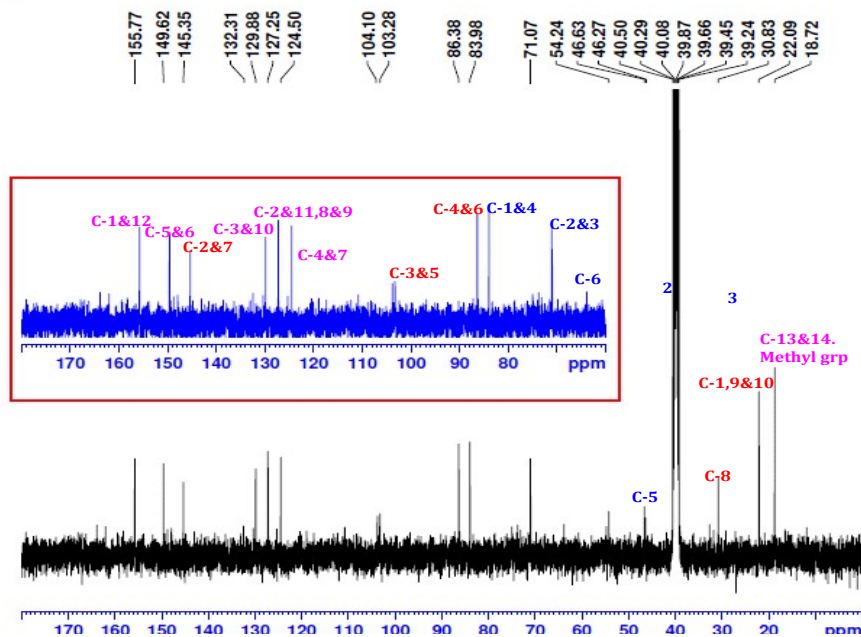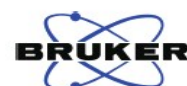

Current Data Parameters  
NAME New folder  
EXPNO 42  
PROCNO 1

F2 - Acquisition Parameters  
Date\_ 20180123  
Time 13.23 h  
INSTRUM spect  
PROBHD Z108618\_0505 (  
PULPROG zgpg30  
TD 65536  
SOLVENT DMSO  
NS 512  
DS 4  
SWH 24038.461 Hz  
FIDRES 0.733596 Hz  
AQ 1.3631488 sec  
RG 199.6  
DW 20.800 usec  
DE 6.50 usec  
TE 297.2 K  
D1 2.00000000 sec  
D11 0.03000000 sec  
TD0 1  
SFO1 100.6550186 MHz  
NUC1 13C  
P1 9.80 usec  
PLW1 58.90000000 W  
SFO2 400.2596010 MHz  
NUC2 1H  
CPDPRG2 waliz16  
POPD2 90.00 usec  
PLW2 14.00000000 W  
PLW12 0.35097000 W  
PLW13 0.17654000 W

F2 - Processing parameters  
SI 32768  
SF 100.6449542 MHz  
WDW EM  
SSB 0  
LB 1.00 Hz  
GB 0  
PC 1.40

# <sup>19</sup>F NMR of 4c

Signature SIF VIT VELLORE  
4c

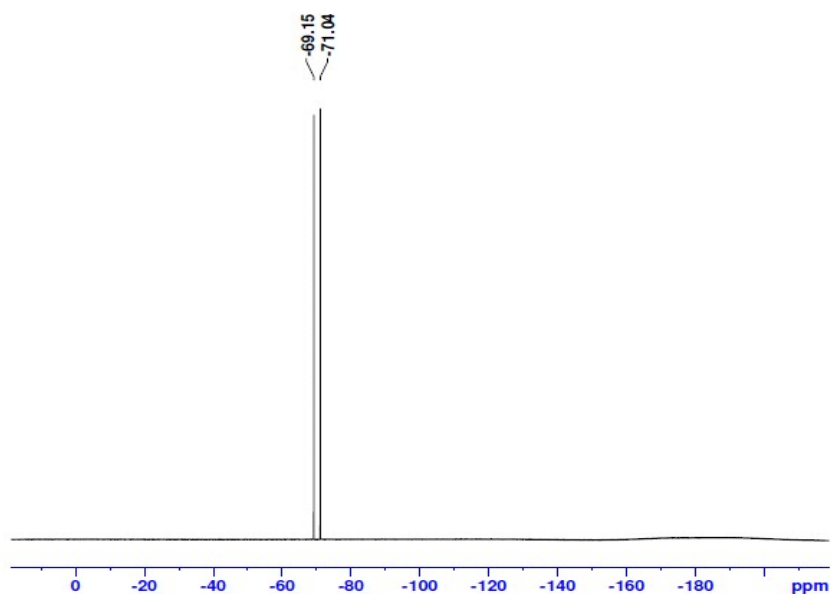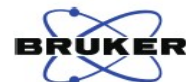

Current Data Parameters  
NAME New folder  
EXPNO 43  
PROCNO 1

F2 - Acquisition Parameters  
Date\_ 20180123  
Time 13.25 h  
INSTRUM spect  
PROBHD Z108618\_0505 (  
PULPROG zgfgqn  
TD 131072  
SOLVENT DMSO  
NS 16  
DS 4  
SWH 89285.711 Hz  
FIDRES 1.362392 Hz  
AQ 0.7340032 sec  
RG 199.6  
DW 5.600 usec  
DE 6.50 usec  
TE 296.8 K  
D1 1.00000000 sec  
TDO 1  
SFO1 376.5811447 MHz  
NUC1 19F  
P1 14.75 usec  
PLW1 19.00000000 W

F2 - Processing parameters  
SI 65536  
SF 376.6188065 MHz  
WDW EM  
SSB 0  
LB 0.30 Hz  
GB 0  
PC 1.00

# <sup>31</sup>P NMR of 4c

Signature SIF VIT VELLORE  
4c

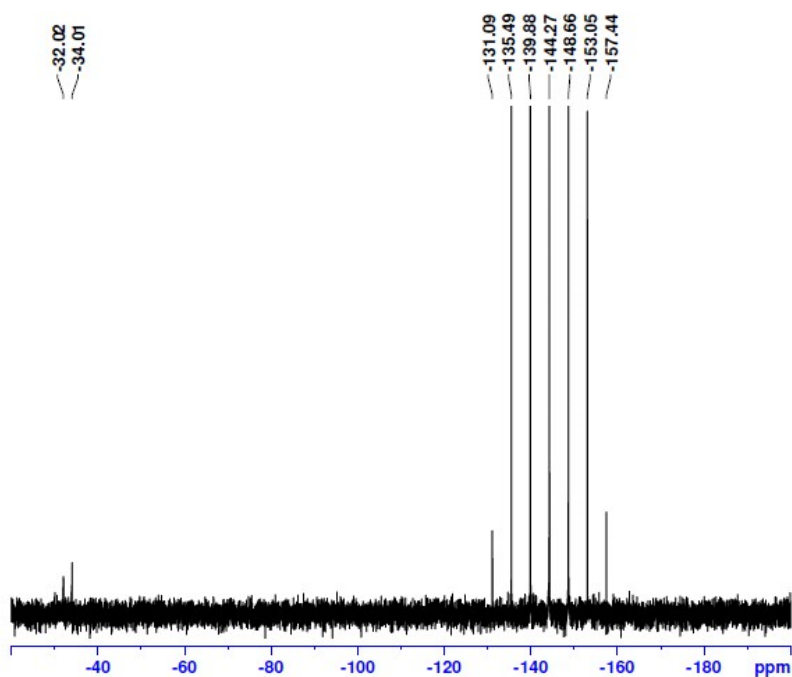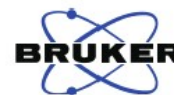

Current Data Parameters  
NAME for nmr data  
EXPNO 44  
PROCNO 1

F2 - Acquisition Parameters  
Date\_ 20180123  
Time 14.31 h  
INSTRUM spect  
PROBHD Z108618\_0505 (  
PULPROG zg30  
TD 65536  
SOLVENT DMSO  
NS 32  
DS 4  
SWH 64102.563 H  
FIDRES 1.956255 H  
AQ 0.5111808 s  
RG 199.6  
DW 7.800 u  
DE 6.50 u  
TE 297.1 K  
D1 2.00000000 s  
TDO 1  
SFO1 162.0193069 M  
NUC1 31P  
P1 14.50 u  
PLW1 15.00000000 W

F2 - Processing parameter  
SI 32768  
SF 162.0274083 M  
WDW EM  
SSB 0  
LB 1.00 H  
GB 0  
PC 1.40



# <sup>1</sup>H NMR of 4d

Signature SIF VIT VELLORE  
4d

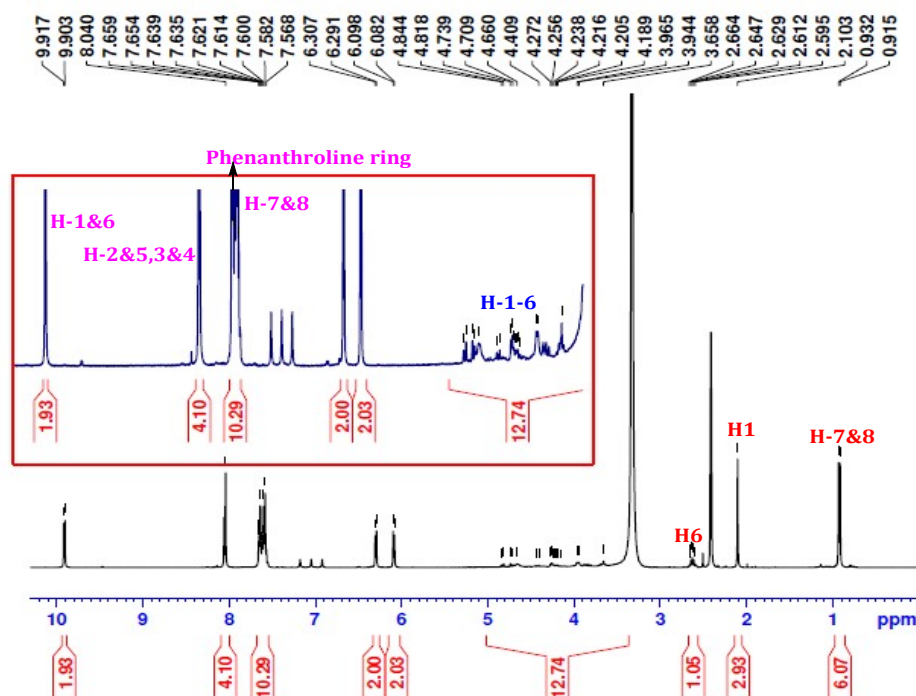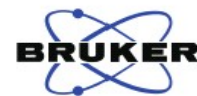

Current Data Parameters  
NAME New folder (2)  
EXPNO 3  
PROCNO 1

F2 - Acquisition Parameters  
Date\_ 20180503  
Time 23.42 h  
INSTRUM spect  
PROBHD Z108618\_0505 ( )  
PULPROG zg30  
TD 65536  
SOLVENT DMSO  
NS 16  
DS 2  
SWH 8012.820 Hz  
FIDRES 0.244532 Hz  
AQ 4.0894465 sec  
RG 77.73  
DW 62.400 usec  
DE 6.50 usec  
TE 299.3 K  
D1 1.0000000 sec  
TD0 1  
SFO1 400.2604716 MHz  
NUC1 1H  
P1 14.27 usec  
PLW1 15.0000000 W

F2 - Processing parameters  
SI 65536  
SF 400.2580381 MHz  
WDW EM  
SSB 0  
LB 0.30 Hz  
GB 0  
PC 1.00

# <sup>13</sup>C NMR of 4d

Signature SIF VIT VELLORE  
4d

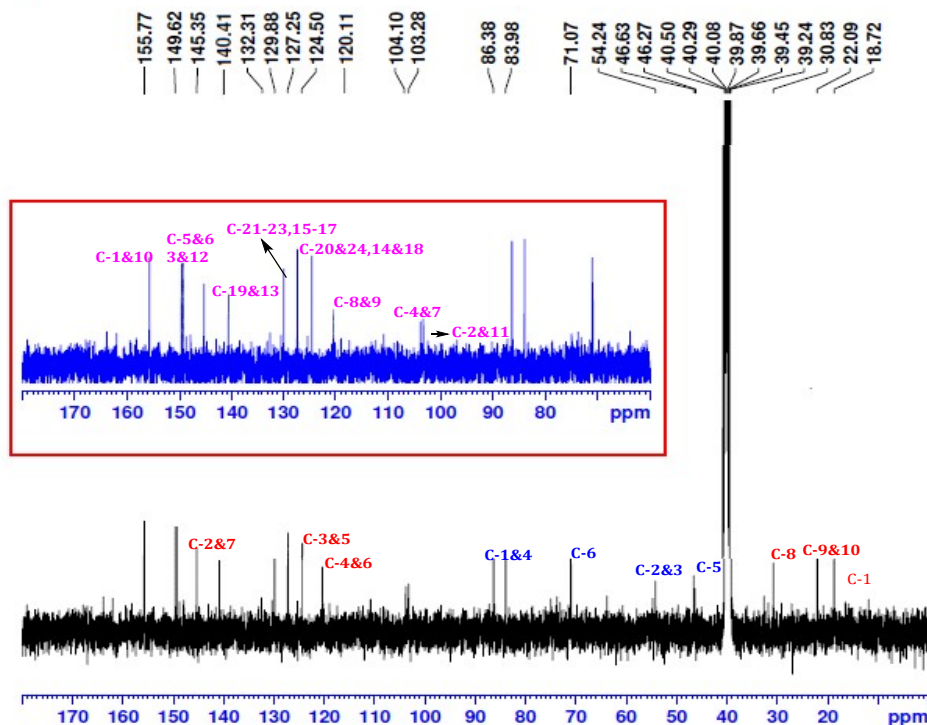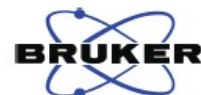

Current Data Parameters  
NAME New folder  
EXPNO 44  
PROCNO 1

F2 - Acquisition Parameters  
Date\_ 20180123  
Time 13.49 h  
INSTRUM spect  
PROBHD Z108618\_0505 ( )  
PULPROG zgpg30  
TD 65536  
SOLVENT DMSO  
NS 512  
DS 4  
SWH 24038.461 Hz  
FIDRES 0.733596 Hz  
AQ 1.3631488 sec  
RG 199.6  
DW 20.800 usec  
DE 6.50 usec  
TE 297.2 K  
D1 2.0000000 sec  
D11 0.03000000 sec  
TD0 1  
SFO1 100.6550186 MHz  
NUC1 13C  
P1 9.80 usec  
PLW1 58.0000000 W  
SFO2 400.2596010 MHz  
NUC2 1H  
CPDPRG2 waltz16  
PCPD2 90.00 usec  
PLW2 14.0000000 W  
PLW12 0.35097000 W  
PLW13 0.17654000 W

F2 - Processing parameters  
SI 32768  
SF 100.6449542 MHz  
WDW EM  
SSB 0  
LB 1.00 Hz  
GB 0  
PC 1.40

# <sup>19</sup>F NMR of 4d

Signature SIF VIT VELLORE  
4d

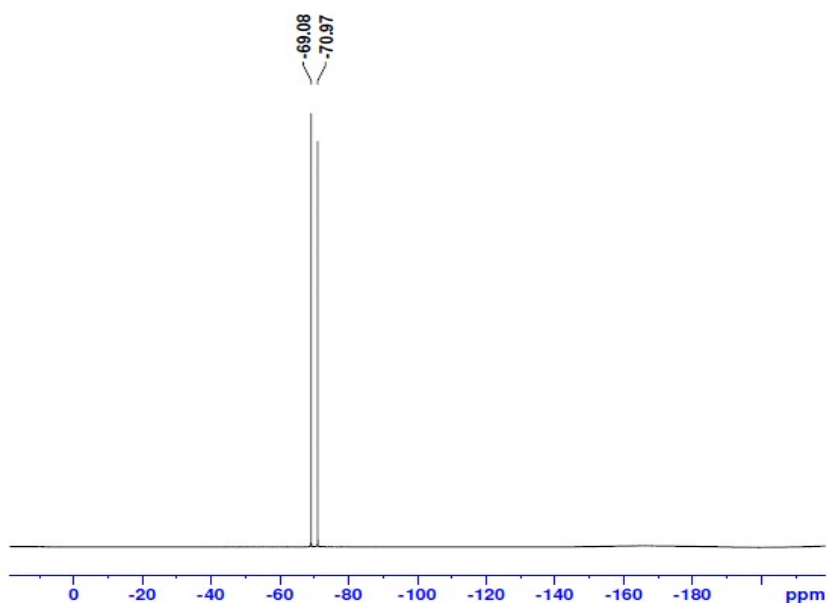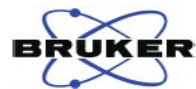

Current Data Parameters  
NAME for nmr data  
EXPNO 8  
PROCNO 1

F2 - Acquisition Parameters  
Date\_ 20180815  
Time 11.29 h  
INSTRUM spect  
PROBHD Z108618\_0505 (  
PULPROG zgflgn  
TD 131072  
SOLVENT DMSO  
NS 16  
DS 4  
SWH 89285.711 Hz  
FIDRES 1.362392 Hz  
AQ 0.7340032 sec  
RG 199.6  
DW 5.600 usec  
DE 6.50 usec  
TE 297.2 K  
D1 1.00000000 sec  
TD0 1  
SFO1 376.5811447 MHz  
NUC1 19F  
P1 14.75 usec  
PLW1 19.00000000 W

F2 - Processing parameters  
SI 65536  
SF 376.6188065 MHz  
WDW EM  
SSB 0  
LB 0.30 Hz  
GB 0  
PC 1.00

# <sup>31</sup>P NMR of 4d

Signature SIF VIT VELLORE  
4d

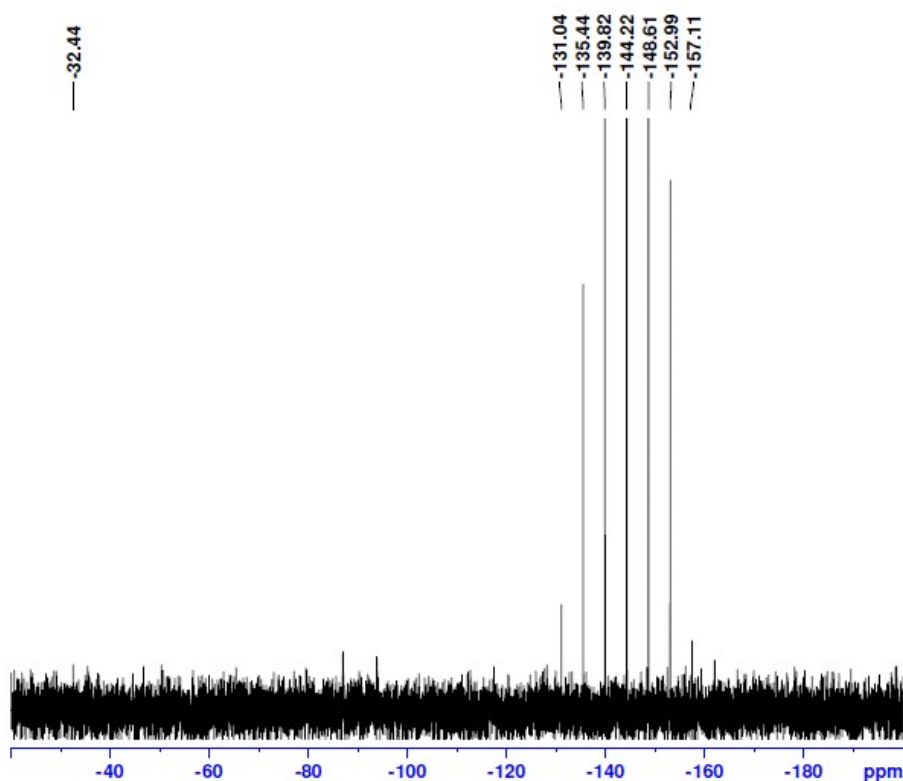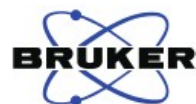

Current Data Parameters  
NAME New folder (2)  
EXPNO 4  
PROCNO 1

F2 - Acquisition Parameters  
Date\_ 20180503  
Time 23.44 h  
INSTRUM spect  
PROBHD Z108618\_0505 (  
PULPROG zg30  
TD 65536  
SOLVENT DMSO  
NS 32  
DS 4  
SWH 64102.563 Hz  
FIDRES 1.956255 Hz  
AQ 0.5111808 sec  
RG 199.6  
DW 7.800 usec  
DE 6.50 usec  
TE 299.2 K  
D1 2.00000000 sec  
TD0 1  
SFO1 162.0193069 MHz  
NUC1 31P  
P1 14.50 usec  
PLW1 15.00000000 W

F2 - Processing parameters  
SI 32768  
SF 162.0274083 MHz  
WDW EM  
SSB 0  
LB 1.00 Hz  
GB 0  
PC 1.40

# <sup>1</sup>H NMR of 4e

Signature SIF VIT VELLORE  
4e

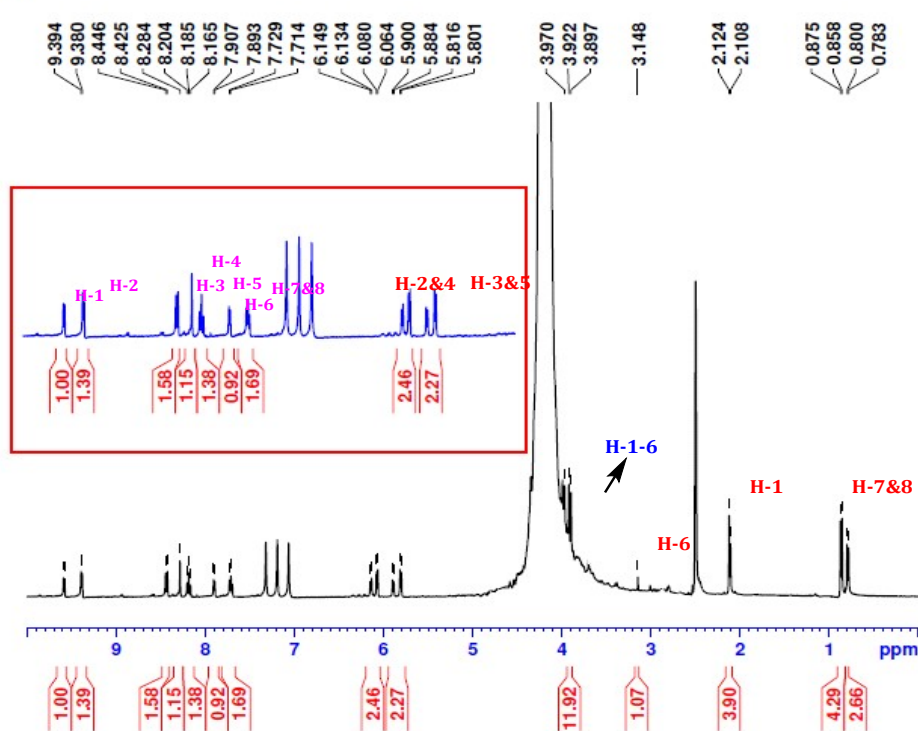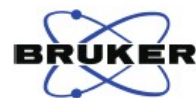

Current Data Parameters  
NAME ann  
EXPNO 65  
PROCNO 1

F2 - Acquisition Parameters  
Date\_ 20200124  
Time 16.58 h  
INSTRUM spect  
PROBHD Z108618\_0505 (zg30)  
PULPROG 65536  
TD 16  
SOLVENT DMSO  
NS 2  
DS 8012.820 Hz  
SWH 0.244532 Hz  
FIDRES 4.0894465 sec  
RG 10.15  
AQ 62.400 usec  
DE 6.50 usec  
TE 296.4 K  
D1 1.00000000 sec  
TDO 1  
SFO1 400.2604716 MHz  
NUC1 1H  
P1 14.00 usec  
PLW1 16.00000000 W

F2 - Processing parameters  
SI 65536  
SF 400.2580042 MHz  
WDW EM  
SSB 0  
LB 0.30 Hz  
GB 0  
PC 1.00

# <sup>13</sup>C NMR of 4e

Signature SIF VIT VELLORE  
4e

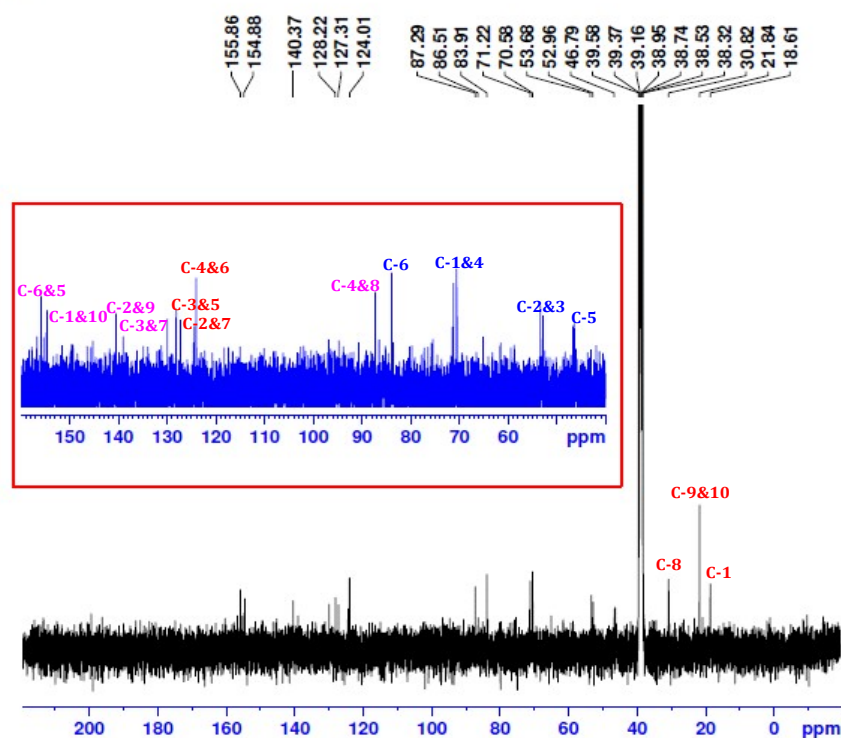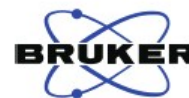

Current Data Parameters  
NAME ann  
EXPNO 66  
PROCNO 1

F2 - Acquisition Parameters  
Date\_ 20200124  
Time 17.30 h  
INSTRUM spect  
PROBHD Z108618\_0505 (zgpg30)  
PULPROG 65536  
TD 512  
SOLVENT DMSO  
NS 4  
DS 24038.461 Hz  
SWH 0.733596 Hz  
FIDRES 1.3631488 sec  
RG 199.6  
AQ 20.800 usec  
DE 6.50 usec  
TE 296.8 K  
D1 2.00000000 sec  
D11 0.03000000 sec  
TDO 1  
SFO1 100.6550186 MHz  
NUC1 13C  
P1 9.80 usec  
PLW1 58.00000000 W  
SFO2 400.2596010 MHz  
NUC2 1H  
CPDPRG2 waltz16  
PCPD2 90.00 usec  
PLW2 16.00000000 W  
PLW12 0.38716000 W  
PLW13 0.19474000 W

F2 - Processing parameters  
SI 32768  
SF 100.6449542 MHz  
WDW EM  
SSB 0  
LB 1.00 Hz  
GB 0  
PC 1.40

# <sup>19</sup>F NMR of 4e

Signature SIF VIT VELLORE  
4e

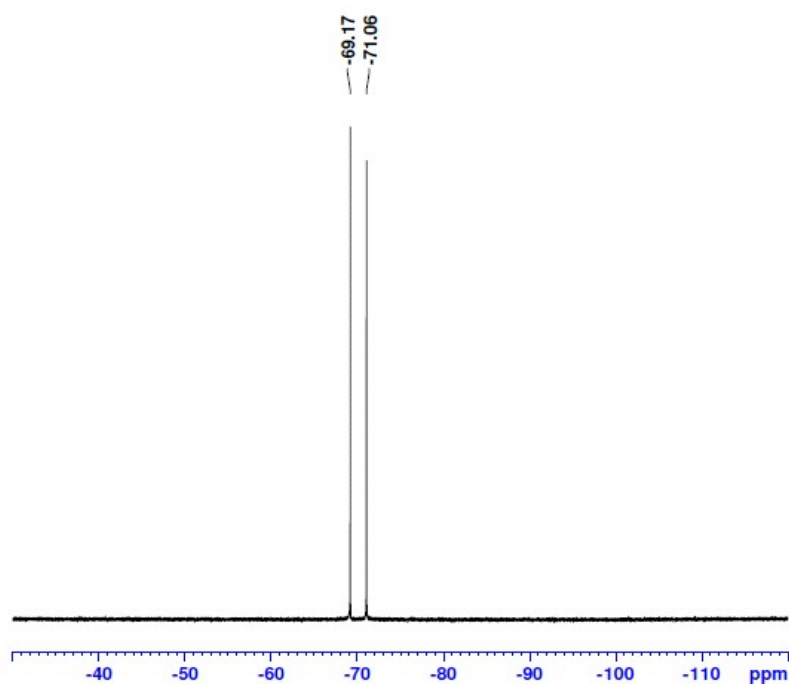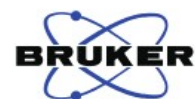

Current Data Parameters  
NAME for nmr data  
EXPNO 9  
PROCNO 1

F2 - Acquisition Parameter:  
Date\_ 20180815  
Time 12.08 h  
INSTRUM spect  
PROBHD Z108618\_0505 (  
PULPROG zgflgn  
TD 131072  
SOLVENT DMSO  
NS 16  
DS 4  
SWH 89285.711 Hz  
FIDRES 1.362392 Hz  
AQ 0.7340032 se  
RG 199.6  
DW 5.600 us  
DE 6.50 us  
TE 305.4 K  
D1 1.00000000 se  
TD0 1  
SFO1 376.5811447 MH  
NUC1 19F  
P1 14.75 us  
PLW1 19.00000000 W

F2 - Processing parameters  
SI 65536  
SF 376.6188065 MH  
WDW EM  
SSB 0  
LB 0.30 Hz  
GB 0  
PC 1.00

# <sup>31</sup>P NMR of 4e

Signature SIF VIT VELLORE  
4e

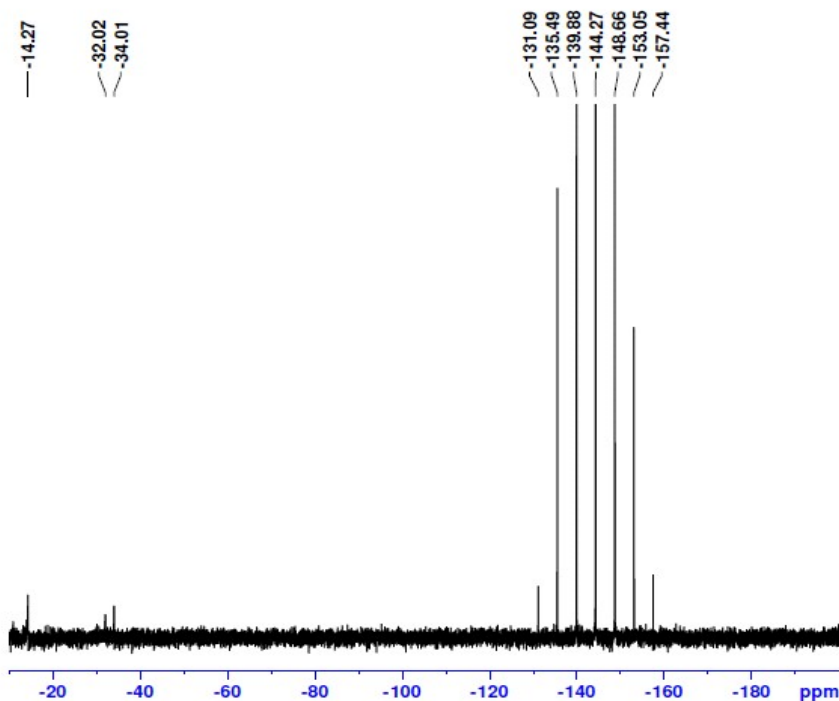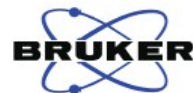

Current Data Parameters  
NAME for nmr data  
EXPNO 11  
PROCNO 1

F2 - Acquisition Parameters  
Date\_ 20180815  
Time 13.47 h  
INSTRUM spect  
PROBHD Z108618\_0505 (  
PULPROG zg30  
TD 65536  
SOLVENT DMSO  
NS 32  
DS 4  
SWH 64102.563 Hz  
FIDRES 1.956255 Hz  
AQ 0.5111808 sec  
RG 199.6  
DW 7.800 usec  
DE 6.50 usec  
TE 297.1 K  
D1 2.00000000 sec  
TD0 1  
SFO1 162.0193069 MHz  
NUC1 31P  
P1 14.50 usec  
PLW1 15.00000000 W

F2 - Processing parameters  
SI 32768  
SF 162.0274083 MHz  
WDW EM  
SSB 0  
LB 1.00 Hz  
GB 0  
PC 1.40



# <sup>1</sup>H NMR of 4f

Signature SIF VIT VELLORE  
4f

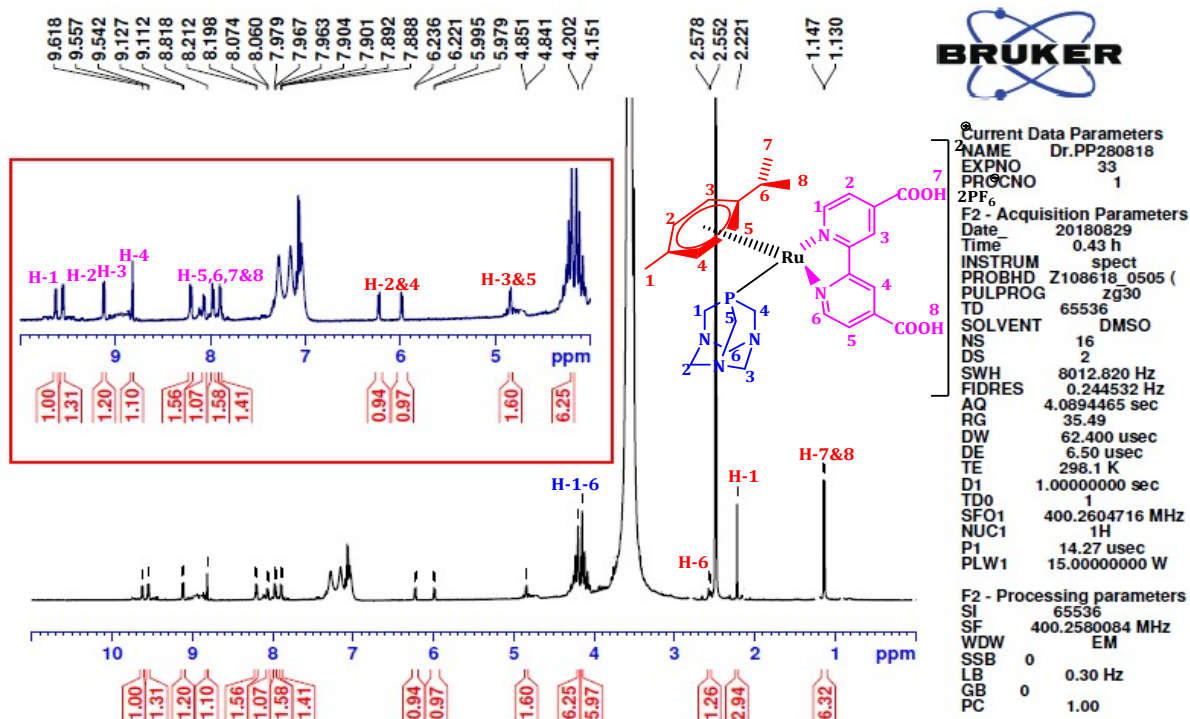

# <sup>13</sup>C NMR of 4f

Signature SIF VIT VELLORE  
4f

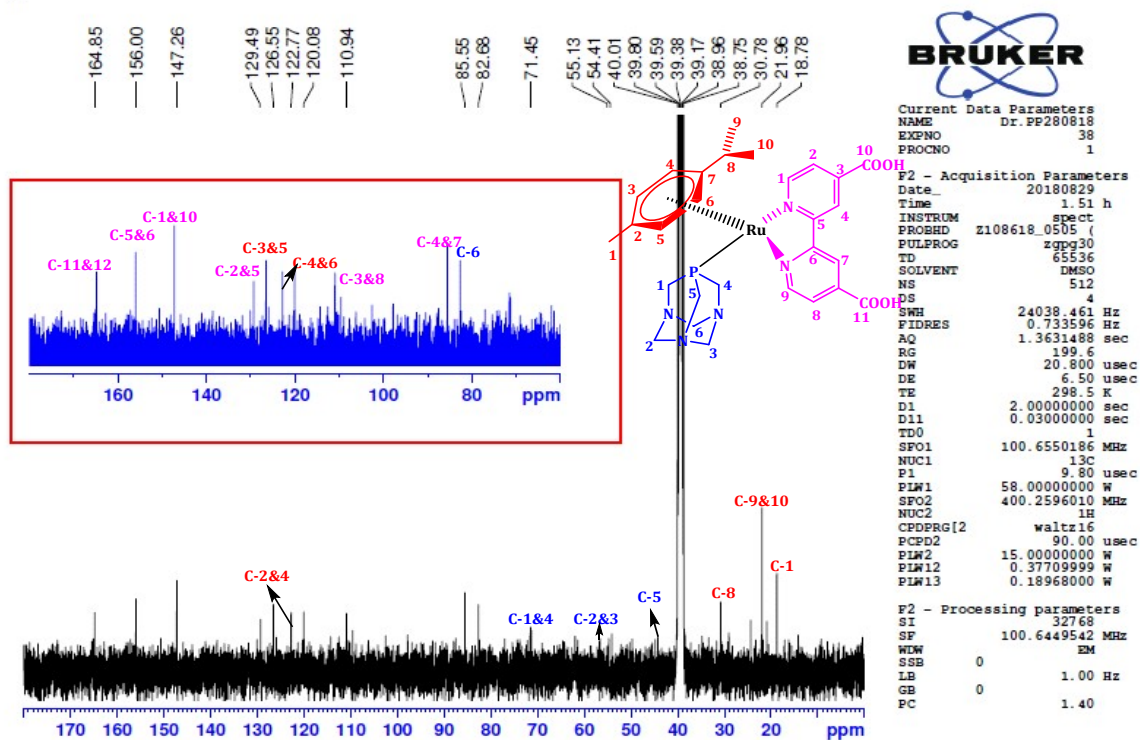

# <sup>19</sup>F NMR of 4f

Signature SIF VIT VELLORE  
4f

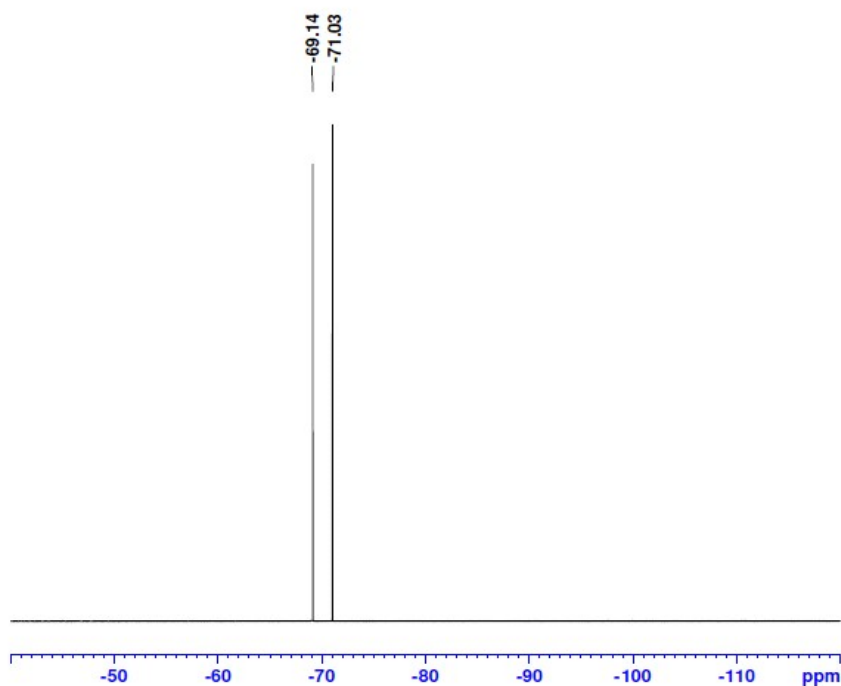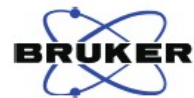

Current Data Parameters  
NAME Dr.PP280818  
EXPNO 35  
PROCNO 1

F2 - Acquisition Parameters  
Date\_ 20180829  
Time 1.15 h  
INSTRUM spect  
PROBHD Z108618\_0505 (  
PULPROG zgffqn  
TD 131072  
SOLVENT DMSO  
NS 16  
DS 4  
SWH 89285.711 Hz  
FIDRES 1.362392 Hz  
AQ 0.7340032 sec  
RG 199.6  
DW 5.600 usec  
DE 6.50 usec  
TE 298.2 K  
D1 1.00000000 sec  
TD0 1  
SFO1 376.5811447 MHz  
NUC1 19F  
P1 14.75 usec  
PLW1 19.00000000 W

F2 - Processing parameters  
SI 65536  
SF 376.6188065 MHz  
WDW EM  
SSB 0  
LB 0.30 Hz  
GB 0  
PC 1.00

# <sup>31</sup>P NMR of 4f

Signature SIF VIT VELLORE  
4f

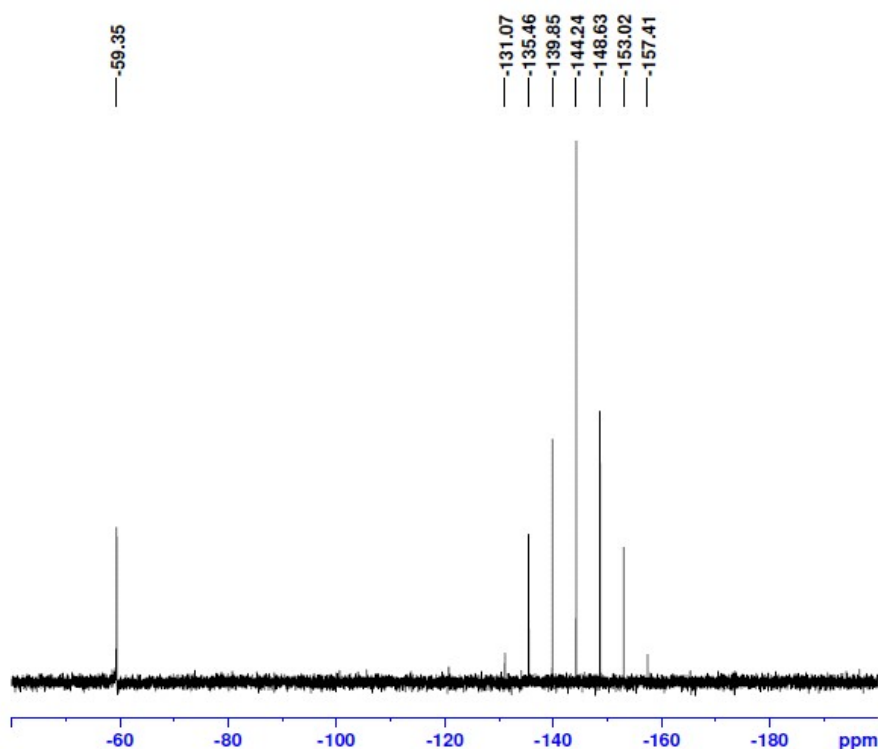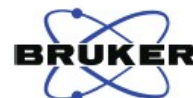

Current Data Parameters  
NAME Dr.PP280818  
EXPNO 36  
PROCNO 1

F2 - Acquisition Parameters  
Date\_ 20180829  
Time 1.17 h  
INSTRUM spect  
PROBHD Z108618\_0505 (  
PULPROG zg30  
TD 65536  
SOLVENT DMSO  
NS 32  
DS 4  
SWH 64102.563 Hz  
FIDRES 1.956255 Hz  
AQ 0.5111808 sec  
RG 199.6  
DW 7.800 usec  
DE 6.50 usec  
TE 298.2 K  
D1 2.00000000 sec  
TD0 1  
SFO1 162.0193069 MHz  
NUC1 31P  
P1 14.50 usec  
PLW1 15.00000000 W

F2 - Processing parameters  
SI 32768  
SF 162.0274083 MHz  
WDW EM  
SSB 0  
LB 1.00 Hz  
GB 0  
PC 1.40

# <sup>1</sup>H NMR of 4g

Signature SIF VIT VELLORE  
4g

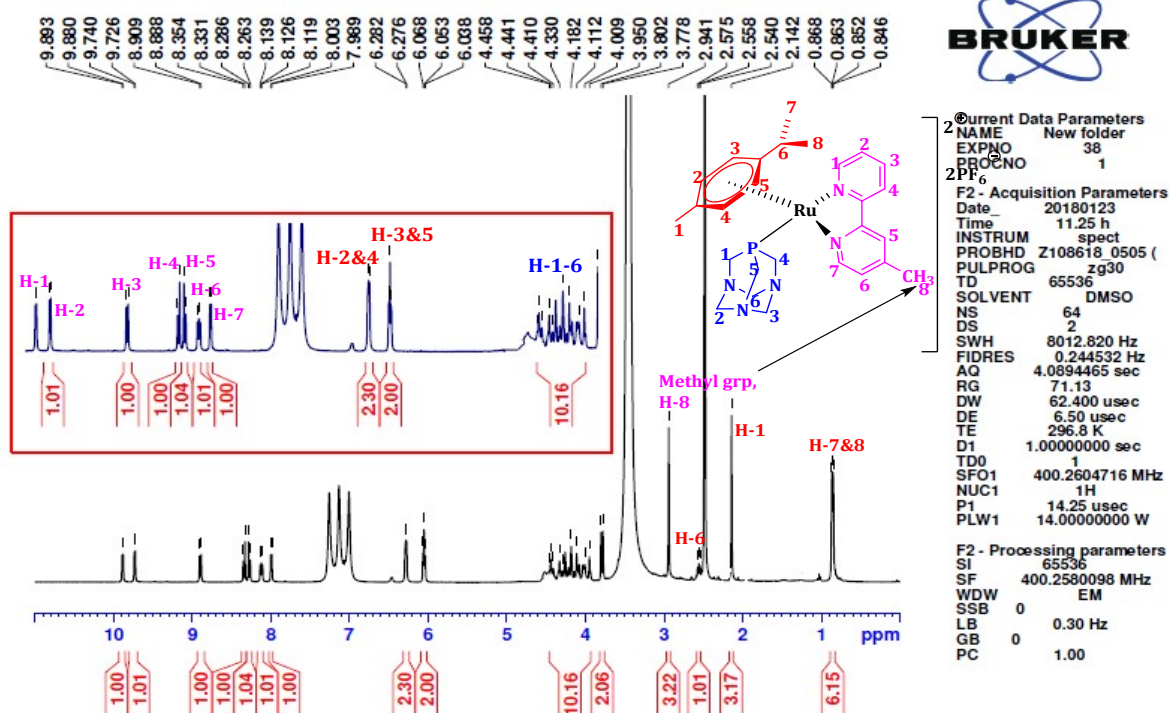

# <sup>13</sup>C NMR of 4g

Signature SIF VIT VELLORE  
4g

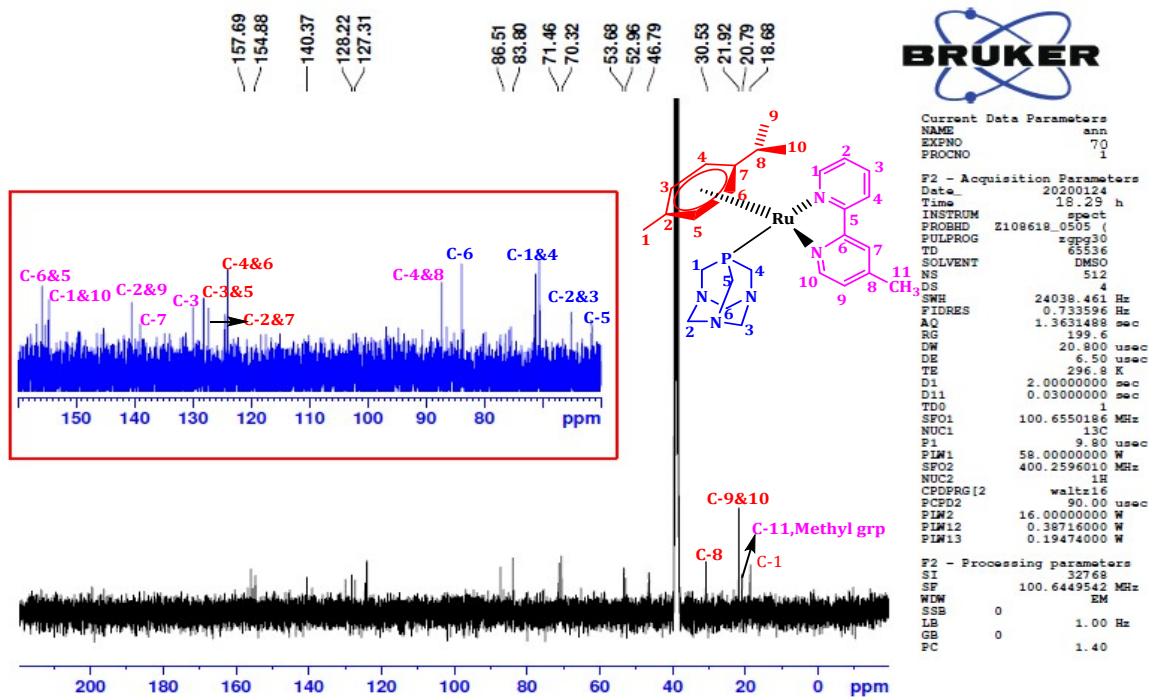

# <sup>19</sup>F NMR of 4g

Signature SIF VIT VELLORE  
4g

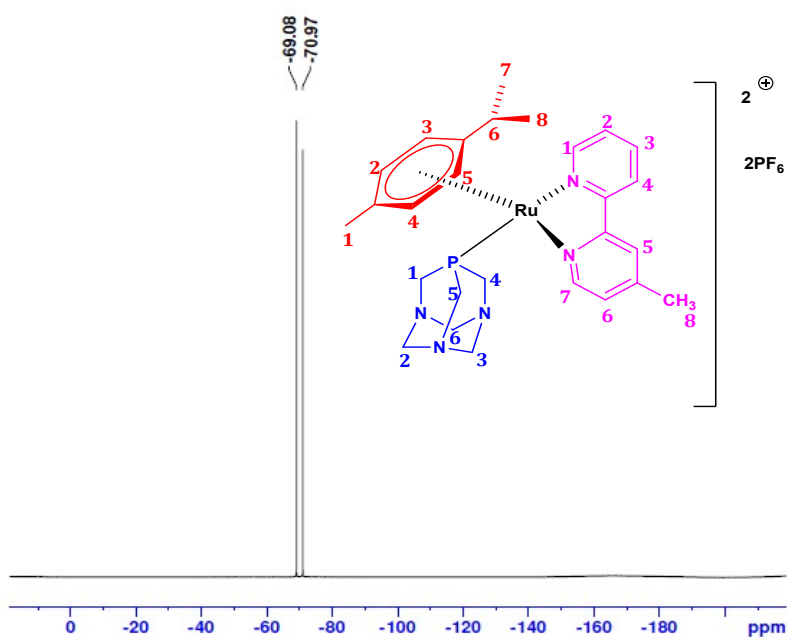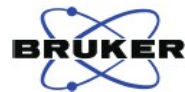

Current Data Parameters  
NAME for nmr data  
EXPNO 40  
PROCNO 1

F2 - Acquisition Parameters  
Date\_ 20180815  
Time 12.29 h  
INSTRUM spect  
PROBHD Z108618\_0505 (  
PULPROG zgflgn  
TD 131072  
SOLVENT DMSO  
NS 16  
DS 4  
SWH 89285.711 Hz  
FIDRES 1.362392 Hz  
AQ 0.7340032 sec  
RG 199.6  
DW 5.600 usec  
DE 6.50 usec  
TE 297.2 K  
D1 1.00000000 sec  
TD0 1  
SFO1 376.5811447 MHz  
NUC1 19F  
P1 14.75 usec  
PLW1 19.00000000 W

F2 - Processing parameters  
SI 65536  
SF 376.6188065 MHz  
WDW EM  
SSB 0  
LB 0.30 Hz  
GB 0  
PC 1.00

# <sup>31</sup>P NMR of 4g

Signature SIF VIT VELLORE  
4g

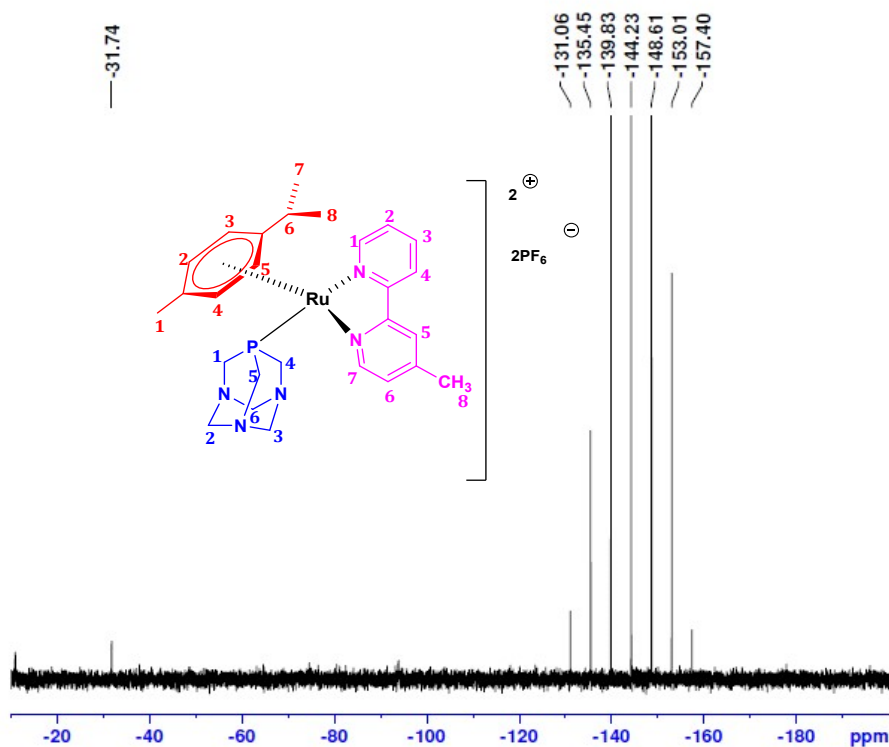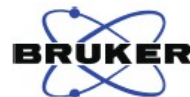

Current Data Parameters  
NAME New folder  
EXPNO 39  
PROCNO 1

F2 - Acquisition Parameters  
Date\_ 20180123  
Time 11.28 h  
INSTRUM spect  
PROBHD Z108618\_0505 (  
PULPROG zg30  
TD 65536  
SOLVENT DMSO  
NS 32  
DS 4  
SWH 64102.563 Hz  
FIDRES 1.956255 Hz  
AQ 0.5111808 sec  
RG 199.6  
DW 7.800 usec  
DE 6.50 usec  
TE 296.7 K  
D1 2.00000000 sec  
TD0 1  
SFO1 162.0193069 MHz  
NUC1 31P  
P1 14.50 usec  
PLW1 15.00000000 W

F2 - Processing parameters  
SI 32768  
SF 162.0274083 MHz  
WDW EM  
SSB 0  
LB 1.00 Hz  
GB 0  
PC 1.40

# FT-IR Spectra

## Complex 4a

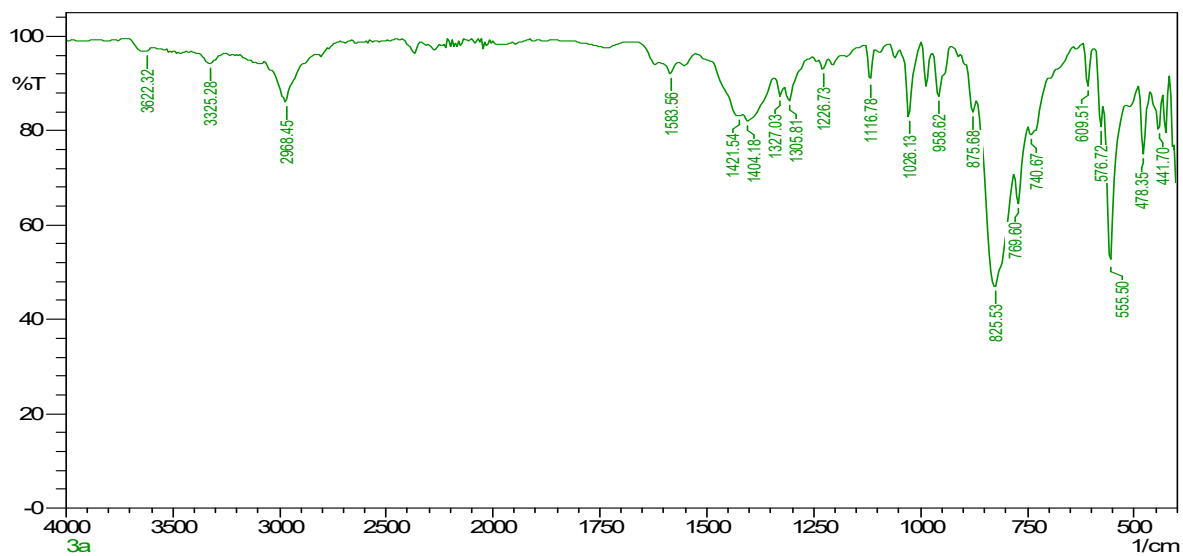

## Complex 4b

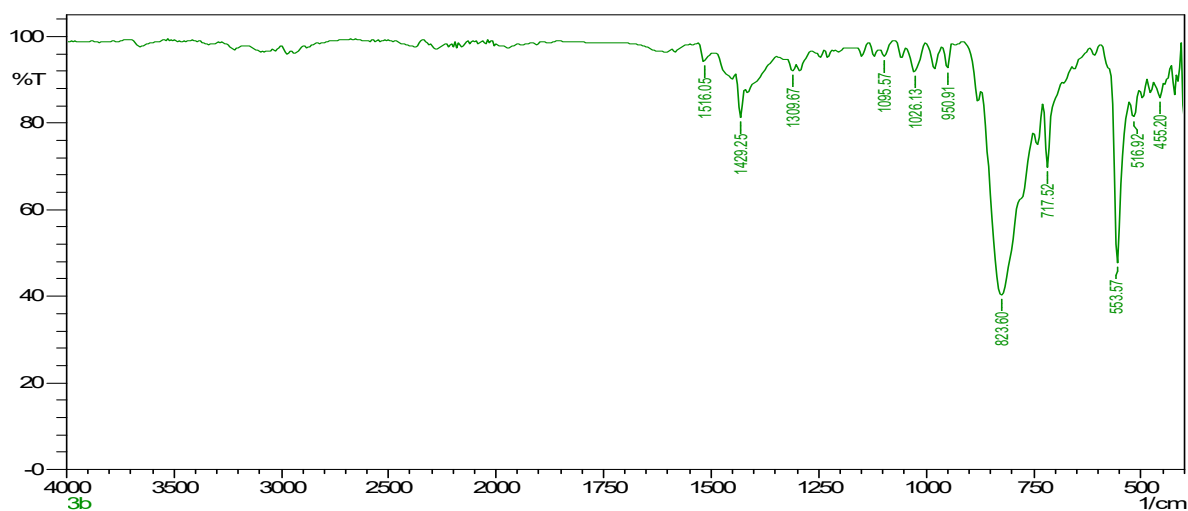

## Complex 4c

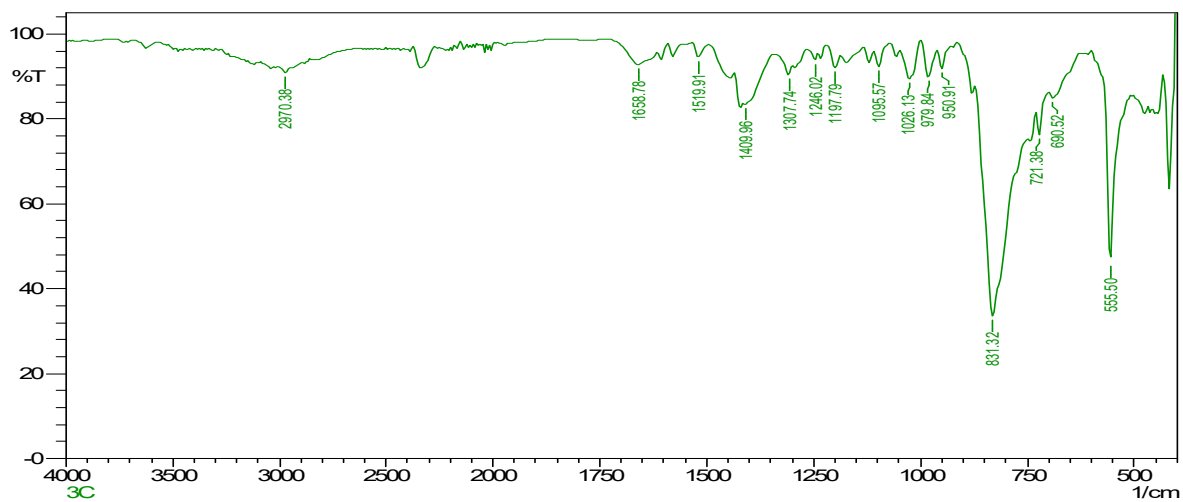



### Complex 4d

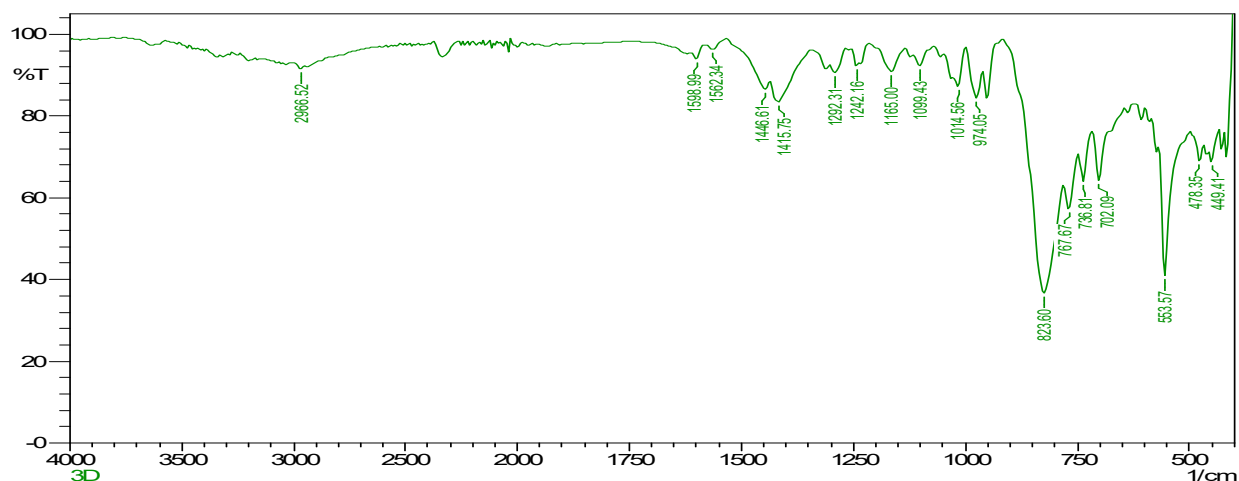

### Complex 4e

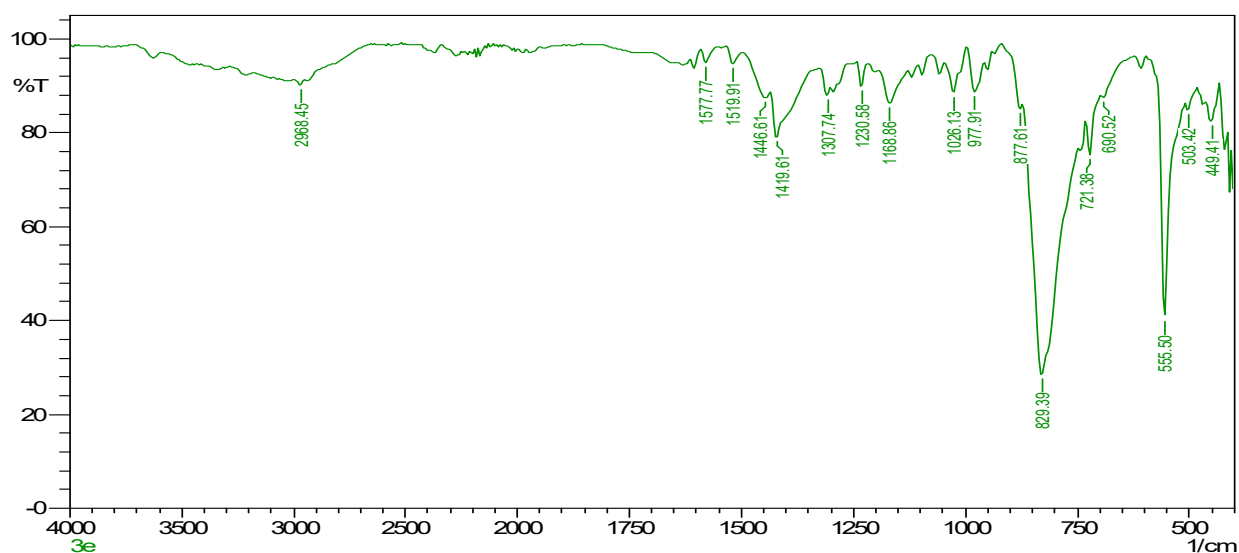

### Complex 4f

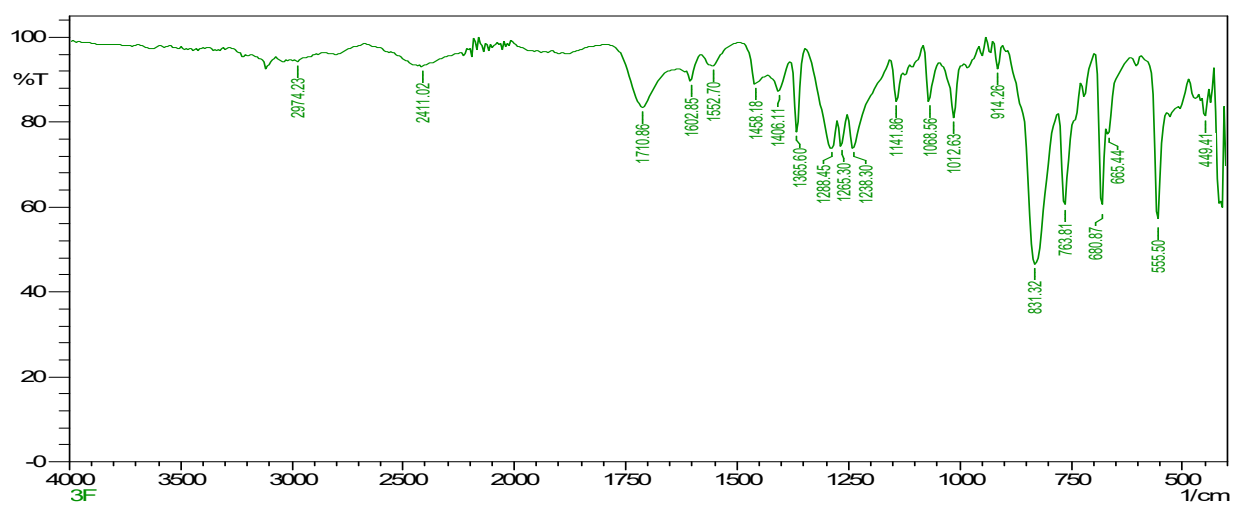

### Complex 4g

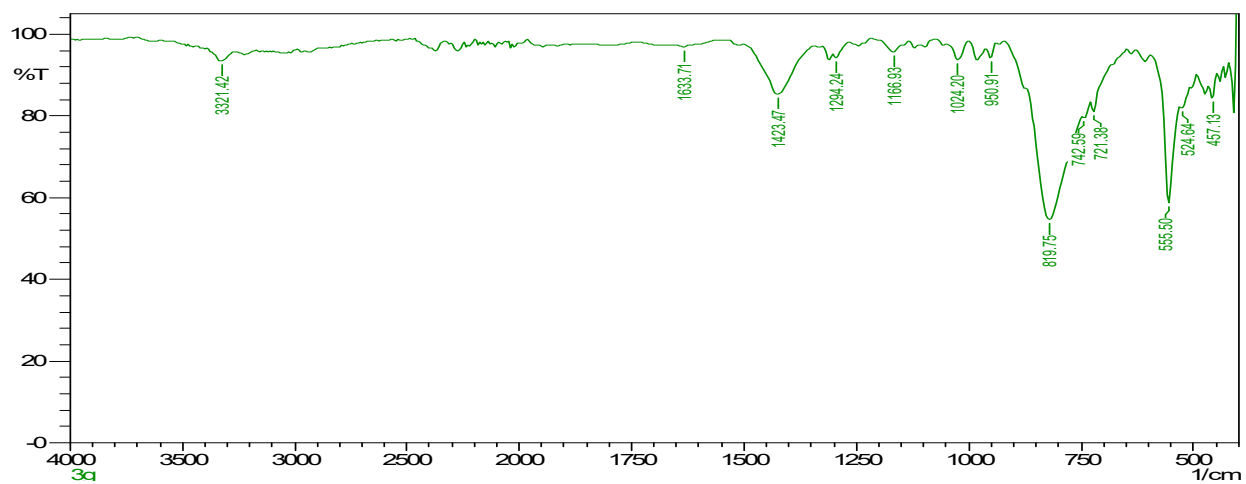

### Complex 4h

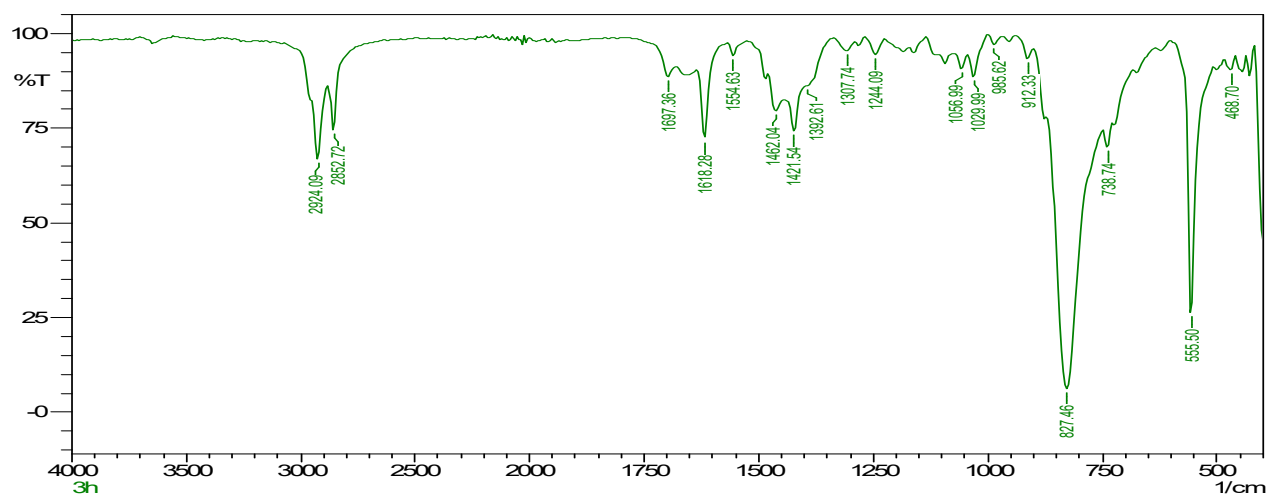

# Purity (UPLC)

## Complex 4a

| SAMPLE INFORMATION |                         |                     |                     |
|--------------------|-------------------------|---------------------|---------------------|
| Sample Name:       | 3a                      | Acquired By:        | System              |
| Sample Type:       | Standard                | Sample Set Name:    | anuja               |
| Vial:              | 1:F,1                   | Acq. Method Set:    | VIT                 |
| Injection #:       | 1                       | Processing Method:  | aishwarya           |
| Injection Volume:  | 5.00 ul                 | Channel Name:       | PDA Ch2 400nm@4.8nm |
| Run Time:          | 5.0 Minutes             | Proc. Chnl. Descr.: | PDA Ch2 400nm@4.8nm |
| Date Acquired:     | 24-01-2019 11:08:48 IST |                     |                     |
| Date Processed:    | 31-01-2019 11:53:36 IST |                     |                     |

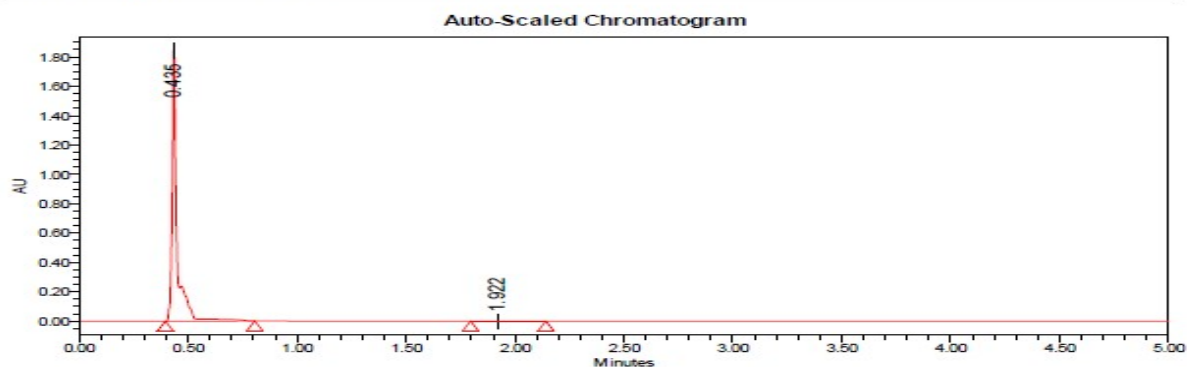

| Peak Results |       |         |        |
|--------------|-------|---------|--------|
| Name         | RT    | Area    | % Area |
| 1            | 0.435 | 2883961 | 99.93  |
| 2            | 1.922 | 2069    | 0.07   |

## Complex 4b

| SAMPLE INFORMATION |                         |                     |                     |
|--------------------|-------------------------|---------------------|---------------------|
| Sample Name:       | 3b                      | Acquired By:        | System              |
| Sample Type:       | Standard                | Sample Set Name:    | anuja               |
| Vial:              | 1:F,2                   | Acq. Method Set:    | VIT                 |
| Injection #:       | 1                       | Processing Method:  | aishwarya           |
| Injection Volume:  | 5.00 ul                 | Channel Name:       | PDA Ch2 400nm@4.8nm |
| Run Time:          | 5.0 Minutes             | Proc. Chnl. Descr.: | PDA Ch2 400nm@4.8nm |
| Date Acquired:     | 24-01-2019 11:15:27 IST |                     |                     |
| Date Processed:    | 31-01-2019 11:54:06 IST |                     |                     |

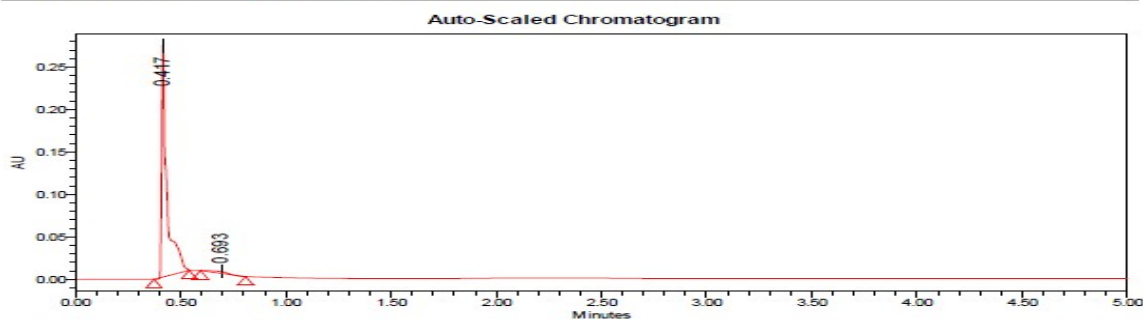

| Peak Results |       |        |        |
|--------------|-------|--------|--------|
| Name         | RT    | Area   | % Area |
| 1            | 0.417 | 462395 | 97.22  |
| 2            | 0.693 | 13224  | 2.78   |



## Complex 4c

| SAMPLE INFORMATION |                         |                     |                      |
|--------------------|-------------------------|---------------------|----------------------|
| Sample Name:       | 3c                      | Acquired By:        | System               |
| Sample Type:       | Standard                | Sample Set Name:    | anuja                |
| Vial:              | 1:F,3                   | Acq. Method Set:    | VIT                  |
| Injection #:       | 1                       | Processing Method:  | alshwarya            |
| Injection Volume:  | 5.00 ul                 | Channel Name:       | PDA, Ch2 400nm@4.8nm |
| Run Time:          | 5.0 Minutes             | Proc. Chnl. Descr.: | PDA, Ch2 400nm@4.8nm |
| Date Acquired:     | 24-01-2019 11:22:04 IST |                     |                      |
| Date Processed:    | 31-01-2019 11:54:44 IST |                     |                      |

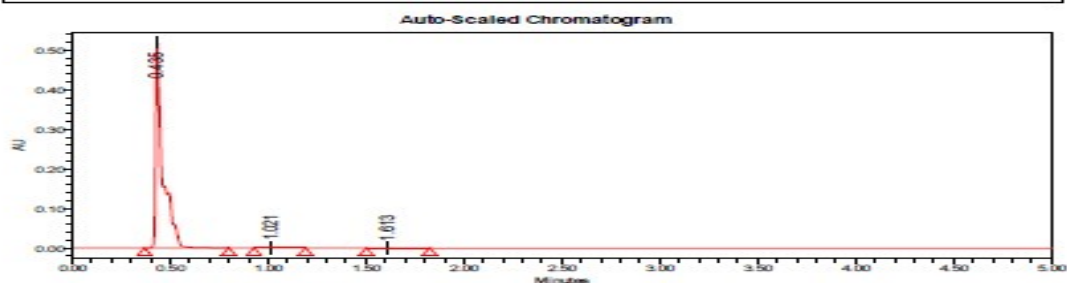

| Peak Results |       |         |        |
|--------------|-------|---------|--------|
| Name         | RT    | Area    | % Area |
| 1            | 0.435 | 1218484 | 99.75  |
| 2            | 1.021 | 1299    | 0.09   |
| 3            | 1.613 | 2056    | 0.16   |

Reported by User: System  
 Report Method: siva  
 Report Method ID: 55550  
 Page: 1 of 1

Project Name: VIT TBI  
 Date Printed: 15-03-2019  
 13:54:39 Asia/Kolkata

## Complex 4d

| SAMPLE INFORMATION |                         |                     |                      |
|--------------------|-------------------------|---------------------|----------------------|
| Sample Name:       | 3d                      | Acquired By:        | System               |
| Sample Type:       | Standard                | Sample Set Name:    | anuja                |
| Vial:              | 1:F,4                   | Acq. Method Set:    | VIT                  |
| Injection #:       | 1                       | Processing Method:  | alshwarya            |
| Injection Volume:  | 5.00 ul                 | Channel Name:       | PDA, Ch2 400nm@4.8nm |
| Run Time:          | 5.0 Minutes             | Proc. Chnl. Descr.: | PDA, Ch2 400nm@4.8nm |
| Date Acquired:     | 24-01-2019 11:28:41 IST |                     |                      |
| Date Processed:    | 31-01-2019 11:55:28 IST |                     |                      |

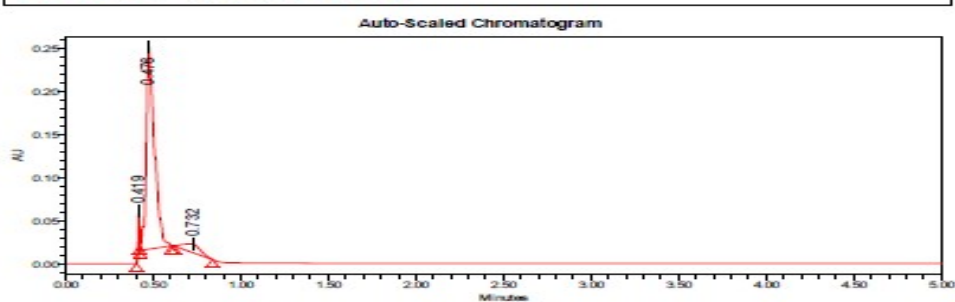

| Peak Results |       |        |        |
|--------------|-------|--------|--------|
| Name         | RT    | Area   | % Area |
| 1            | 0.419 | 17060  | 2.05   |
| 2            | 0.475 | 749648 | 89.98  |
| 3            | 0.732 | 66603  | 7.99   |

Reported by User: System  
 Report Method: siva  
 Report Method ID: 55550  
 Page: 1 of 1

Project Name: VIT TBI  
 Date Printed: 15-03-2019  
 13:54:25 Asia/Kolkata

## Complex 4e

| SAMPLE INFORMATION |                         |                     |                     |
|--------------------|-------------------------|---------------------|---------------------|
| Sample Name:       | 3e                      | Acquired By:        | System              |
| Sample Type:       | Standard                | Sample Set Name:    | anuja               |
| Vial:              | 1:F,5                   | Acq. Method Set:    | VIT                 |
| Injection #:       | 1                       | Processing Method:  | alshwarya           |
| Injection Volume:  | 5.00 ul                 | Channel Name:       | PDA Ch2 400nm@4.8nm |
| Run Time:          | 5.0 Minutes             | Proc. Chnl. Descr.: | PDA Ch2 400nm@4.8nm |
| Date Acquired:     | 24-01-2019 11:35:15 IST |                     |                     |
| Date Processed:    | 31-01-2019 11:56:18 IST |                     |                     |

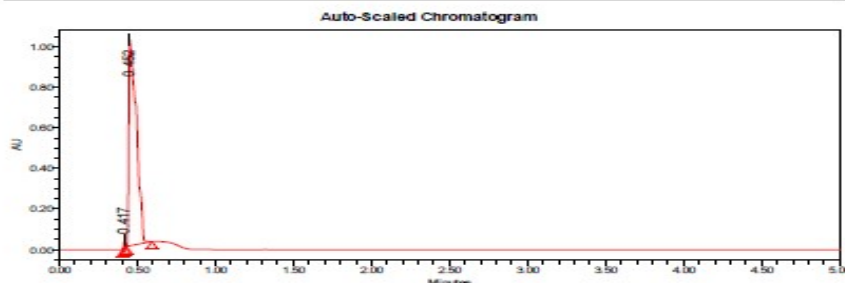

| Peak Results |       |        |       |
|--------------|-------|--------|-------|
| Name         | RT    | Area   | %Area |
| 1            | 0.417 | 15993  | 0.40  |
| 2            | 0.452 | 342098 | 99.54 |

Reported by User: System  
 Report Method: sva  
 Report Method ID: 5550  
 Page: 1 of 1

Project Name: VIT TBI  
 Date Printed: 15-03-2019  
 13:54:12 Asia/Kolkata

## Complex 4f

| SAMPLE INFORMATION |                         |                     |                     |
|--------------------|-------------------------|---------------------|---------------------|
| Sample Name:       | 3f                      | Acquired By:        | System              |
| Sample Type:       | Standard                | Sample Set Name:    | anuja               |
| Vial:              | 1:F,5                   | Acq. Method Set:    | VIT                 |
| Injection #:       | 1                       | Processing Method:  | alshwarya           |
| Injection Volume:  | 5.00 ul                 | Channel Name:       | PDA Ch2 400nm@4.8nm |
| Run Time:          | 5.0 Minutes             | Proc. Chnl. Descr.: | PDA Ch2 400nm@4.8nm |
| Date Acquired:     | 24-01-2019 11:41:51 IST |                     |                     |
| Date Processed:    | 31-01-2019 11:57:02 IST |                     |                     |

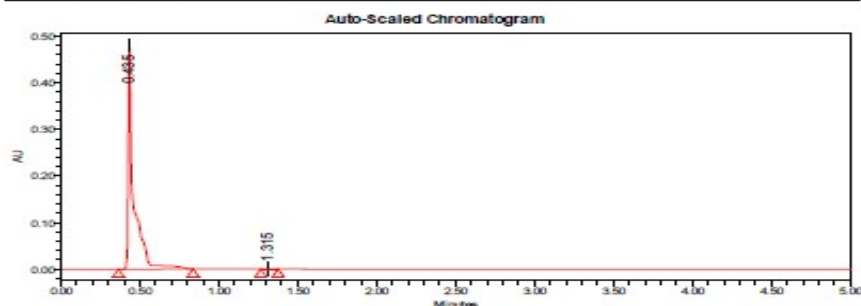

| Peak Results |       |         |       |
|--------------|-------|---------|-------|
| Name         | RT    | Area    | %Area |
| 1            | 0.435 | 1142377 | 99.99 |
| 2            | 1.315 | 76      | 0.01  |

Reported by User: System  
 Report Method: sva  
 Report Method ID: 5550  
 Page: 1 of 1

Project Name: VIT TBI  
 Date Printed: 15-03-2019  
 13:53:53 Asia/Kolkata

## Complex 4g

| SAMPLE INFORMATION |                         |                     |                     |
|--------------------|-------------------------|---------------------|---------------------|
| Sample Name:       | 3g                      | Acquired By:        | System              |
| Sample Type:       | Standard                | Sample Set Name:    | anuja               |
| Vial:              | 1:F,7                   | Acq. Method Set:    | VIT                 |
| Injection #:       | 1                       | Processing Method:  | alshwarya           |
| Injection Volume:  | 5.00 ul                 | Channel Name:       | PDA Ch2 400nm@4.8nm |
| Run Time:          | 5.0 Minutes             | Proc. Chnl. Descr.: | PDA Ch2 400nm@4.8nm |
| Date Acquired:     | 24-01-2019 11:48:26 IST |                     |                     |
| Date Processed:    | 31-01-2019 11:58:31 IST |                     |                     |

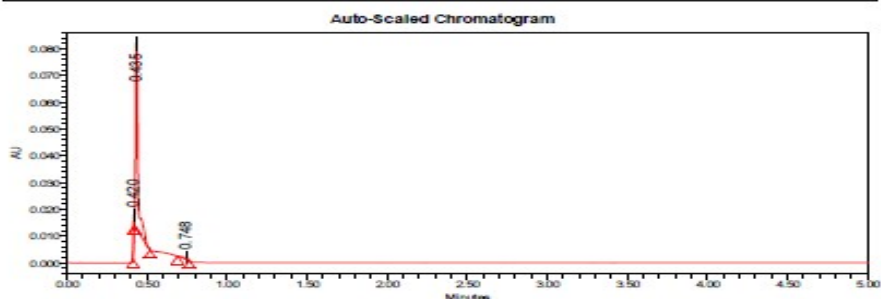

| Peak Results |       |       |        |
|--------------|-------|-------|--------|
| Name         | RT    | Area  | % Area |
| 1            | 0.420 | 2599  | 3.25   |
| 2            | 0.435 | 74993 | 94.50  |
| 3            | 0.748 | 1772  | 2.24   |

Reported by User: System  
 Report Method: siva  
 Report Method ID: 55550  
 Page: 1 of 1

Project Name: VIT TBI  
 Date Printed: 15-03-2019  
 13:53:35 Asia/Kolkata

## Complex 4h

| SAMPLE INFORMATION |                         |                     |                     |
|--------------------|-------------------------|---------------------|---------------------|
| Sample Name:       | 3h                      | Acquired By:        | System              |
| Sample Type:       | Standard                | Sample Set Name:    | anuja               |
| Vial:              | 1:F,8                   | Acq. Method Set:    | VIT                 |
| Injection #:       | 1                       | Processing Method:  | alshwarya           |
| Injection Volume:  | 5.00 ul                 | Channel Name:       | PDA Ch2 400nm@4.8nm |
| Run Time:          | 5.0 Minutes             | Proc. Chnl. Descr.: | PDA Ch2 400nm@4.8nm |
| Date Acquired:     | 24-01-2019 11:55:03 IST |                     |                     |
| Date Processed:    | 31-01-2019 11:59:07 IST |                     |                     |

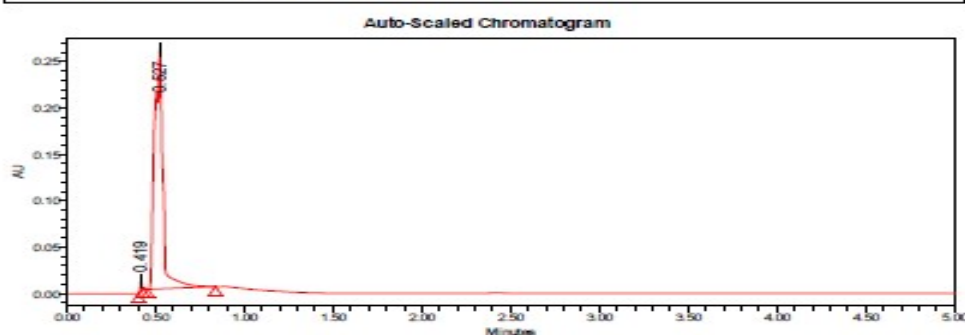

| Peak Results |       |        |        |
|--------------|-------|--------|--------|
| Name         | RT    | Area   | % Area |
| 1            | 0.419 | 5088   | 0.60   |
| 2            | 0.527 | 847545 | 99.40  |

Reported by User: System  
 Report Method: siva  
 Report Method ID: 55550  
 Page: 1 of 1

Project Name: VIT TBI  
 Date Printed: 15-03-2019  
 13:53:21 Asia/Kolkata

## ESI-MS spectra

### Complex 4a

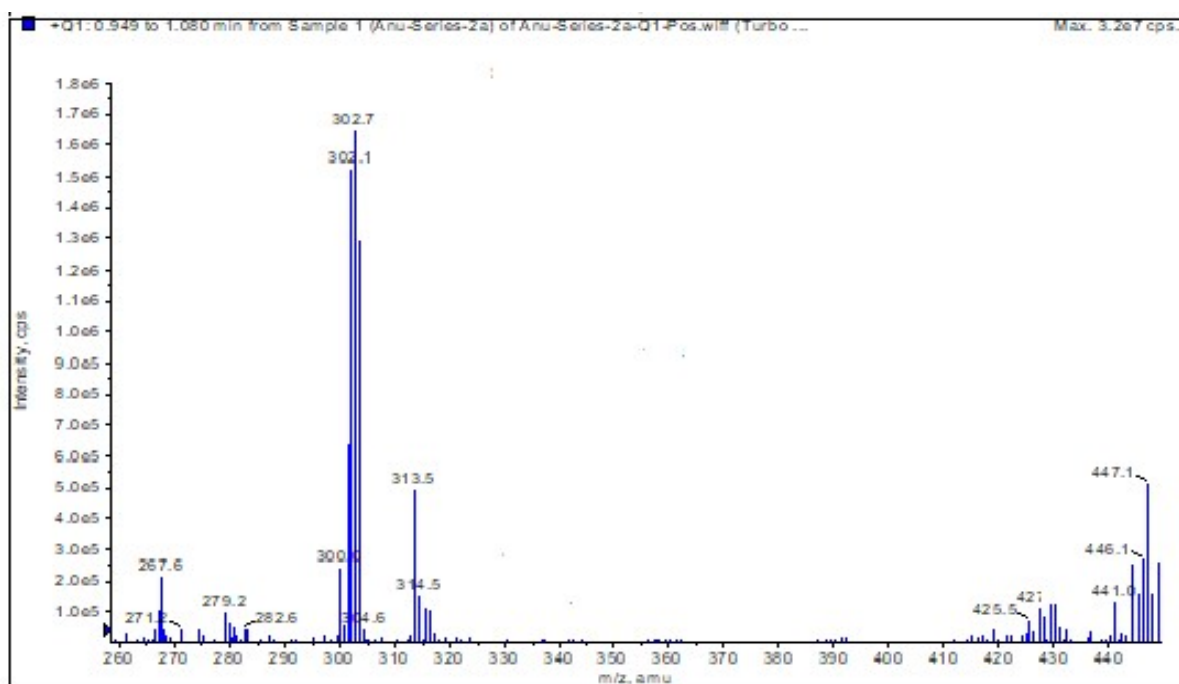

### Complex 4b

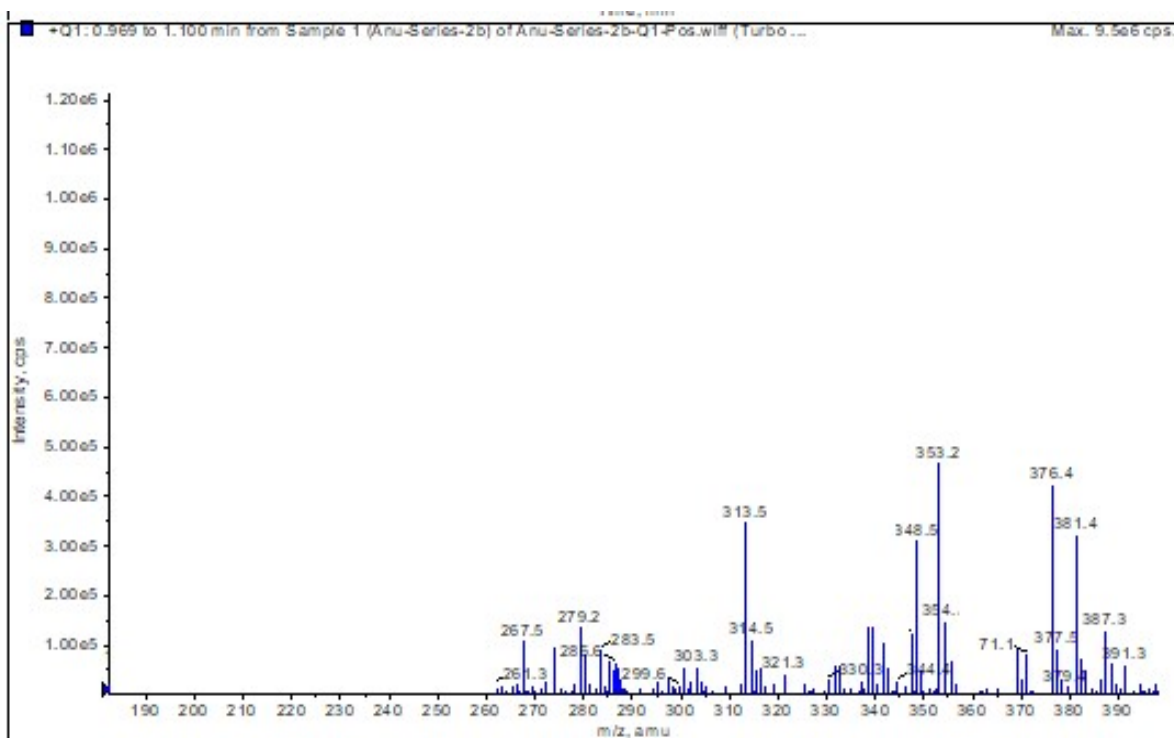

## Complex 4c

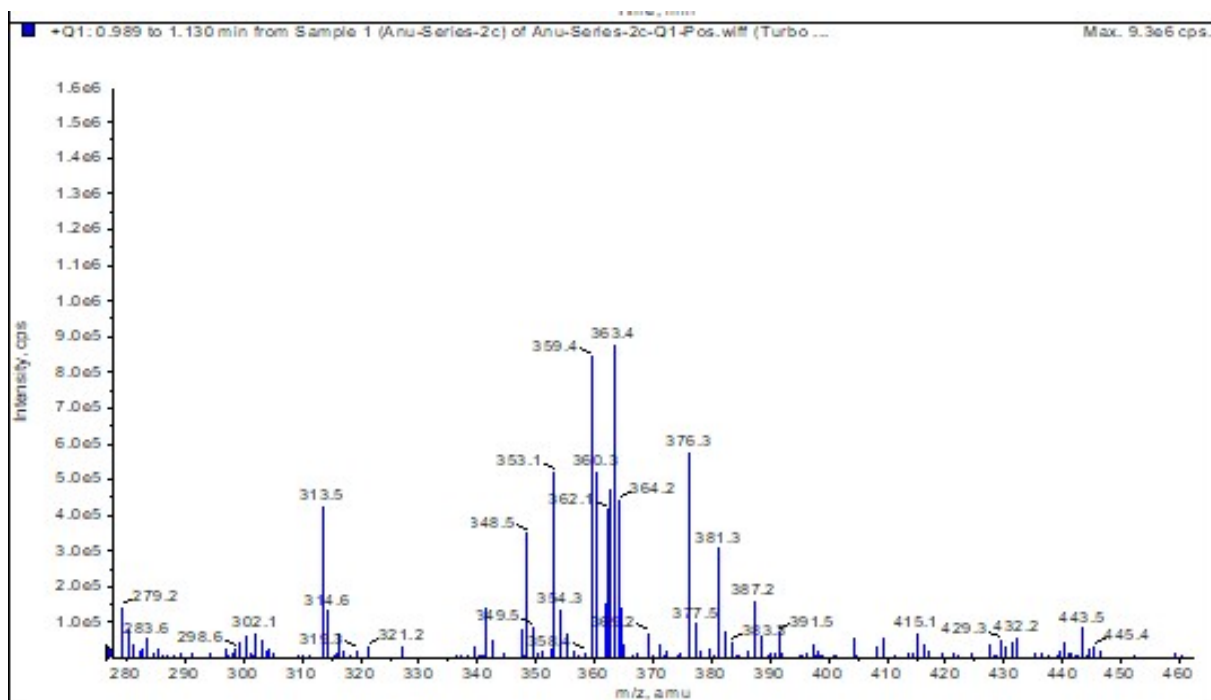

## Complex 4d

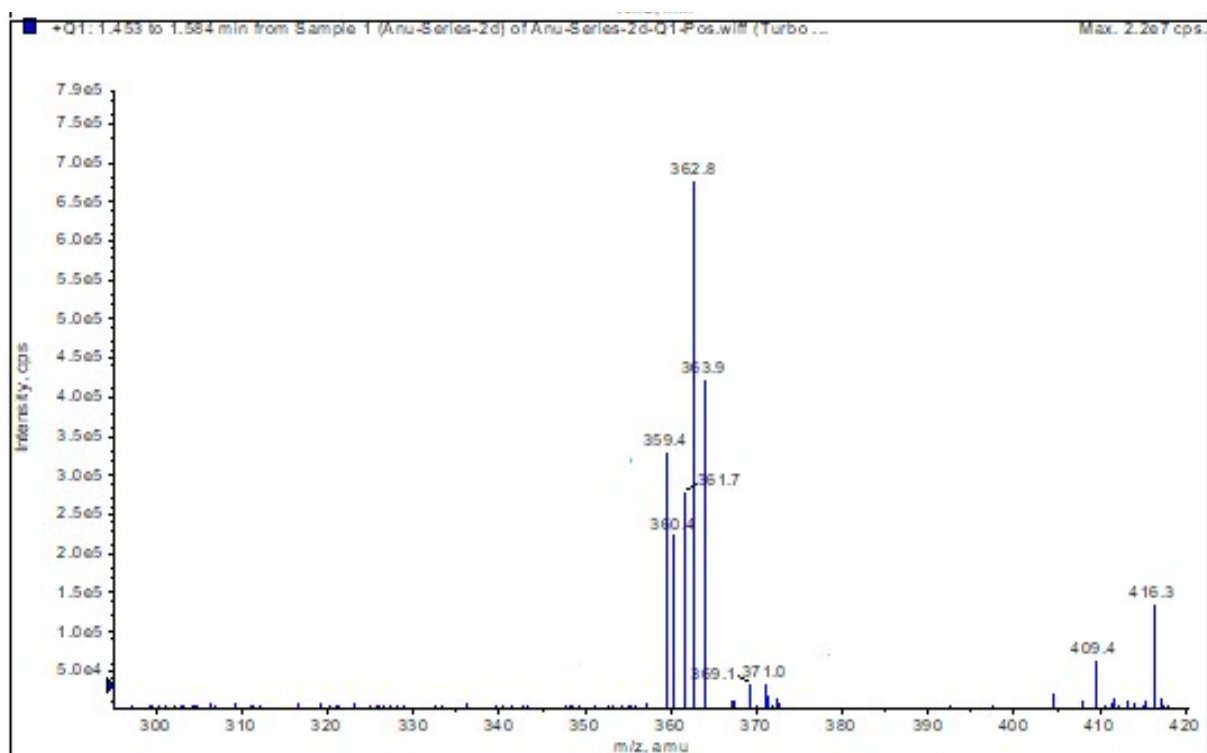

## Complex 4e

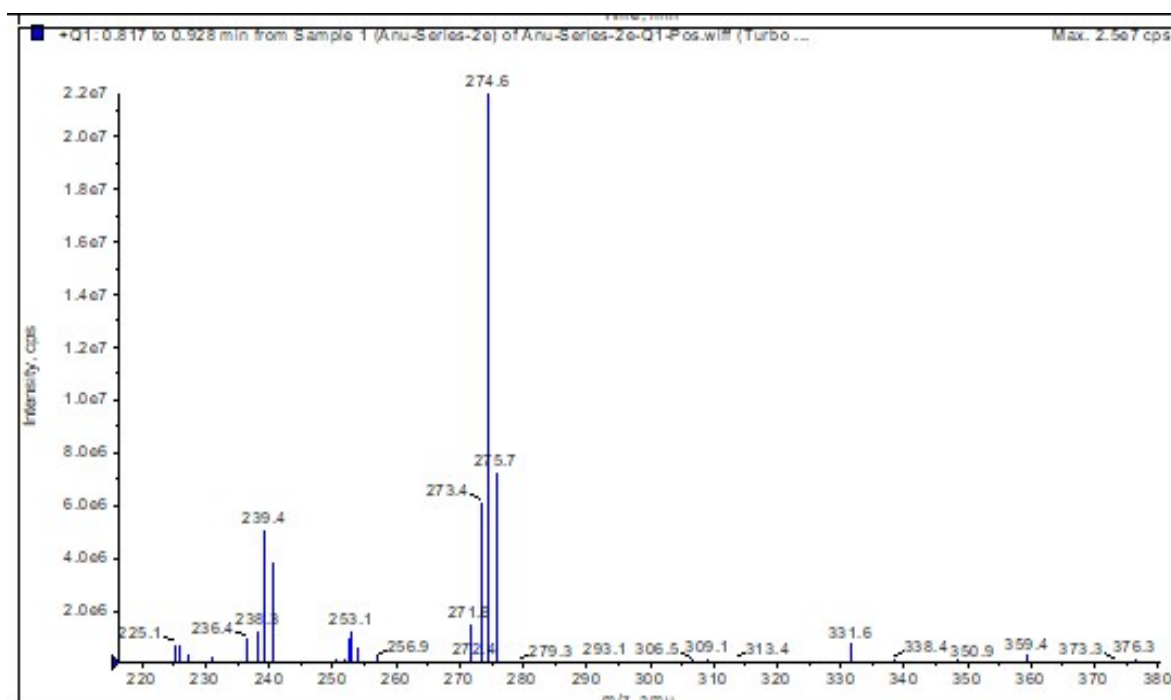

## Complex 4g

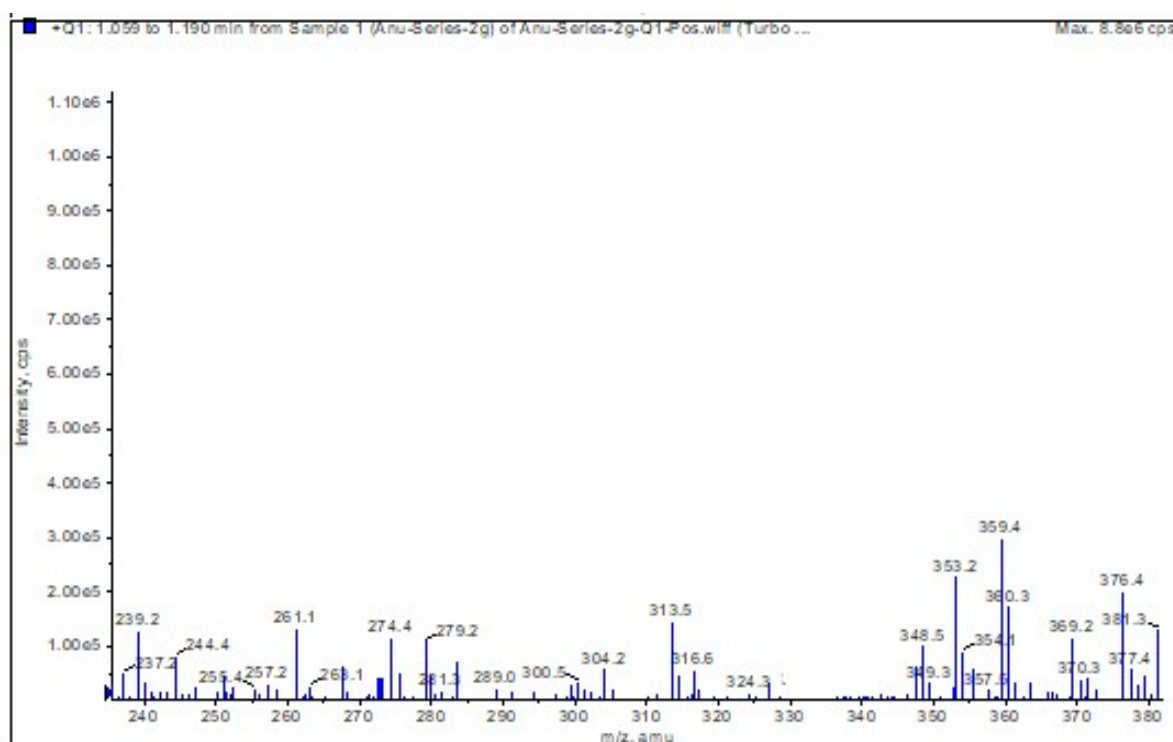

# Complex 4h

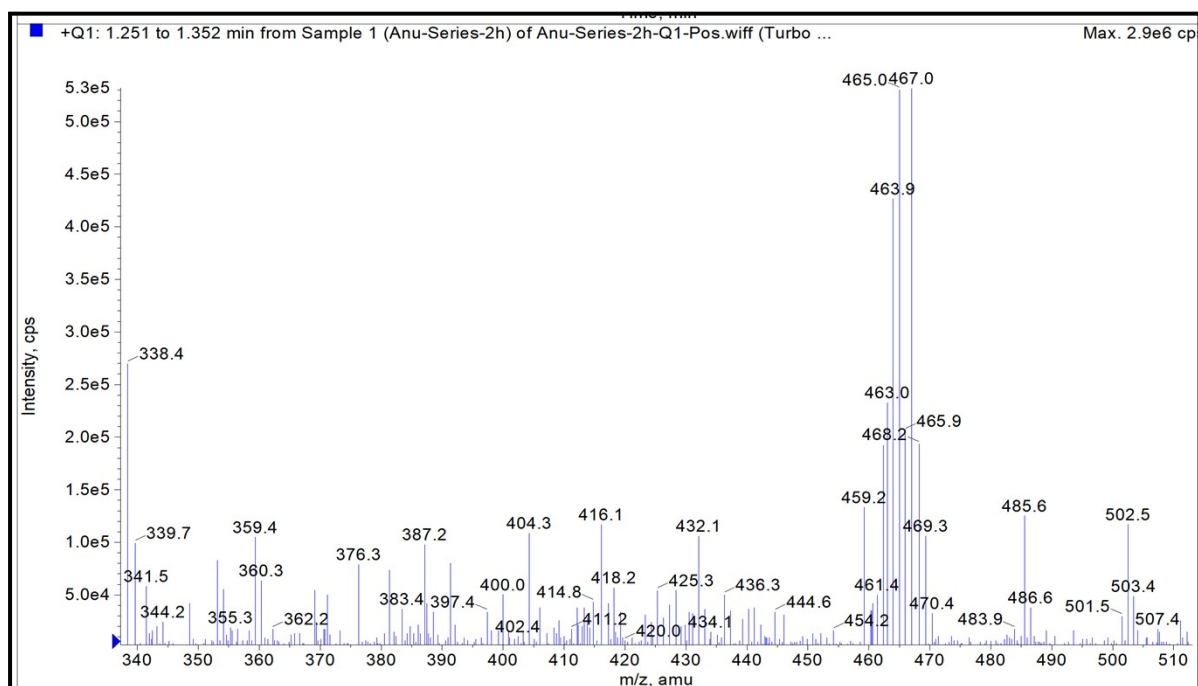

## Experimental Section

### DNA binding study

The binding capability of the complexes with calf-thymus DNA (Ct-DNA) was evaluated using electronic absorption spectroscopy, and the competitive binding assay was studied using ethidium bromide (EtBr) as a quencher by fluorescence spectroscopy.

### UV-visible studies<sup>1</sup>

The DNA binding experiment was performed in aqueous medium using RAPTA complex **4c** in Tris-HCl buffer (5 mM Tris-HCl in water, pH 7.4). The concentration of Ct-DNA was determined using its absorbance at 260 nm and a known molar absorption coefficient of 6600 M<sup>-1</sup>.cm<sup>-1</sup>. In cuvettes, an equal amount of DNA was introduced to both the sample and the reference. The concentration of CT-DNA was increased as the titration progressed. The sample was equilibrated with CT-DNA for around 5 minutes before each measurement, and then the complex's absorbance was measured. The intrinsic DNA binding constant ( $K_b$ ) was calculated using the equation (i):

$$\frac{[DNA]}{(\varepsilon_a - \varepsilon_f)} = \frac{[DNA]}{(\varepsilon_b - \varepsilon_f)} + \frac{1}{K_b(\varepsilon_a - \varepsilon_f)} L \quad (i)$$

Where [DNA] is the concentration of DNA in the base pairs,  $\varepsilon_a$  is the apparent extinction coefficient observed for the complex,  $\varepsilon_f$  corresponds to the extinction coefficient of the complex in its free form, and  $\varepsilon_b$  refers to the extinction coefficient of the complex when fully bound to DNA. The resultant data were plotted using Origin Lab, version 8.5 to obtain the [DNA]/( $\varepsilon_a - \varepsilon_f$ ) vs. [DNA] linear plot. The ratio of the slope to intercept from the linear fit gave the values of the intrinsic binding constants ( $K_b$ ).

### UV and Fluorescence study

All of these RAPTA complexes were studied in a 10% DMSO solution using UV and fluorescence. The fluorescence quantum yields ( $\Phi$ ) were then estimated using the comparative William's approach, which entails utilising a well-characterized standard with a known quantum yield value and a 10% DMSO solution.<sup>2</sup> Quinine sulphate was employed as a standard. Quantum yield was calculated according to the equation (ii):

$$\varphi = \varphi_R \times \frac{I_S}{I_R} \times \frac{OD_R}{OD_S} \times \frac{\eta_S}{\eta_R} \dots \dots (ii)$$



Where,  $\phi$  = quantum yield, I = peak area, OD = absorbance at  $\lambda_{max}$ ,  $\eta$  = refractive index of solvent (s) and reference (R). Here, we have used quinine sulphate as a standard for calculating the quantum yield.

### Ethidium bromide displacement assay

To demonstrate the manner of binding between the complexes and DNA, the ethidium bromide (EtBr) displacement experiment was used.<sup>3</sup> Using ethidium bromide (EtBr) as a spectral probe in 5 mM Tris-HCl buffer, the apparent binding constant ( $K_{app}$ ) of the RAPTA complex **4c** to Ct-DNA was determined at pH = 7.4. Because the fluorescence of EtBr was quenched by the solvent molecules, it was unable to show any fluorescence in its free state. However, in the presence of Ct-DNA, its fluorescence intensity began to increase, indicating that EtBr binds to DNA grooves in an intercalative manner. With increasing concentrations of the complexes, the intensity of the fluorescence was shown to diminish. As a result, the complexes displaced EtBr from CT-DNA grooves and were linked to the DNA base pairs itself. The values of the apparent binding constant ( $K_{app}$ ) were obtained by using the equation (iii):

$$K_{app} \times [Complex]_{50} = k_{EtBr} \times [EtBr] \dots \dots \dots (iii)$$

Where  $K_{EtBr}$  is the EtBr binding constant ( $K_{EtBr} = 1.0 \times 10^7 \text{ M}^{-1}$ ), and  $[EtBr] = 8 \times 10^{-6} \text{ M}$ . Stern-Volmer equation was followed for quantitative determination of the Stern-Volmer quenching constant ( $K_{SV}$ ).<sup>4</sup> Origin (8.5) software was used to plot the fluorescence data to obtain linear plot of  $I_0/I$  vs. [complex]. The value of  $K_{SV}$  was calculated from the following equation.

$$I_0/I = 1 + K_{SV} [Q] \quad (iv)$$

Where  $I_0$  = fluorescence intensity in absence of complex and  $I$  = fluorescence intensities in presence of complex of concentration [Q].

### Protein binding studies<sup>5</sup>

The main component is serum albumin proteins in drug transport and metabolism, as we all know. The interaction of the complex with human serum albumin (BSA) was examined using a tryptophan emission quenching experiment. The association of the RAPTA complexes **4c** and **4d** with the protein BSA was detected using a tryptophan emission quenching assay.

In a Tris-HCl/NaCl buffer, a BSA solution ( $2 \times 10^{-6}$  M) was first made. Following that, the complex's aqueous solutions were gradually added to the BSA solution, with increasing their concentrations gradually. The solutions were carefully agitated for 5 minutes after each addition before the fluorescence was measured at 295 nm ( $\lambda_{ex} = 295$  nm). When the concentration of complex was increased, a gradual drop in BSA fluorescence intensity at 340 nm was detected, confirming that the complex and BSA had interacted. To calculate the quenching constant, the Stern-Volmer equation was used ( $K_{BSA}$ ). Origin Lab, version 8.5 was used to plot the emission spectral data to obtain linear plot of  $I_0/I$  vs. [complex] using the equation (v) given below:

$$I_0/I = 1 + K_{BSA} [Q] = 1 + k_q \tau_0 [Q] \quad (v)$$

Where  $I_0$  is the fluorescence intensity of HSA in absence of complex and  $I$  indicates the fluorescence intensity of HSA in presence of complex of concentration  $[Q]$ ,  $\tau_0$  = lifetime of the tryptophan in HSA found as  $1 \times 10^{-8}$  and  $k_q$  is the quenching constant. Scatchard equation (vi) gives the binding properties of the complexes.<sup>6</sup> Where  $K$  = binding constant and  $n$  = number of binding sites.

$$\log(I_0 - I/I) = \log K + n \log [Q] \quad (vi)$$

### Conductivity measurement<sup>7</sup>

The conductivity of the RAPTA complexes was measured using a conductivity-TDS meter-307 (Systronics, India) and a cell constant of  $1.0 \text{ cm}^{-1}$  to verify the interaction of the complexes with DMSO and aqueous DMSO.

### n-Octanol–water partition coefficient ( $\log P_{o/w}$ )<sup>8</sup>

Using the previously reported shake flask approach, the  $\log P_{o/w}$  of the RAPTA complexes followed the previously described procedure. An orbital shaker was used to shake a known amount of each complexes in water (pre-saturated with n-octanol). The solution was centrifuged at 3000 rpm for 10 minutes to allow phase separation. Different ratios (0.5:1, 1:1, and 2:1) of saturated solutions were shaken for 20 minutes on an orbital shaker with pre-saturated n-octanol to get the partition coefficient. The absorbance of aliquots of the aqueous and octanol layers were measured with a UV-Vis spectrophotometer after adequate dilution. The concentrations of the complexes in each layer were estimated using the corresponding

molar extinction coefficients, and the partition coefficient ( $\log P_{o/w}$ ) values were computed from the ratio.

### Viscosity measurement<sup>9</sup>

A hydrodynamic method such as a viscosity was performed using an Ostwald Viscometer to determine the binding manner of complexes using compound **4c**, **4d**, and EtBr treated DNA with respect to cisplatin.

### Notes and References

1. M. Sirajuddin, S. Ali, A. Badshah, Drug–DNA interactions and their study by UV–Visible, fluorescence spectroscopies and cyclic voltammetry, *J. Photochem. Photobio. B.*, 2013, **124**, 1–19.
2. M. Shamsi-Sani, F. Hirini, SM. Abedini, M. Seddighi, Synthesis of benzimidazole and quinoxaline derivatives using reusable sulfonated rice husk ash (RHA-SO<sub>3</sub>H) as a green and efficient solid acid catalyst, *Res. Chem. Intermed.*, 2016, **42**, 1091–1099.
3. S. Dasari, A. K. Patra, Luminescent europium and terbium complexes of dipyridoquinoxaline and dipyridophenazine ligands as photosensitizing antennae: structures and biological perspectives, *Dalton Trans.*, 2015, **44**, 19844–19855.
4. (a) J. Keizer, Nonlinear fluorescence quenching and the origin of positive curvature in Stern-Volmer plots, *J. Am. Chem. Soc.*, 1983, **105**, 1494–1498. (b) B. Kar, S. Shanavas, A. H. Nagendra, U. Das, N. Roy, S. Pete, A. Sharma S, S. De, A. Kumar SK, S. Vardhan, S. K. Sahoo, D. Panda, S. Shenoy, B. Bose, P. Paira, Iridium(III)–Cp\*-(imidazo[4,5-f][1,10]phenanthroline-2-yl)phenol analogues as hypoxia active, GSH-resistant cancer cytoselective and mitochondria-targeting cancer stem cell therapeutic agents. *Dalton Trans.*, 2022, **51**, 5494–5514.
5. V. D. Suryawanshi, L. S. Walekar, A. H. Gore, P. V. Anbhule, G. B. Kolekar, Spectroscopic analysis on the binding interaction of biologically active pyrimidine derivative with bovine serum albumin, *J. Pharm. Anal.*, 2016, **6**, 56–63.
6. K. Jeyalakshmi, J. Haribabu, C. Balachandran, S. Swaminathan, N. S. P. Bhuvanesh, R. Karvembu, Coordination Behavior of N,N',N''-Trisubstituted

- Guanidine Ligands in Their Ru–Arene Complexes: Synthetic, DNA/Protein Binding, and Cytotoxic Studies, *Organometallics*, 2019, **38**, 753–770.
7. S. Nikolić, L. Rangasamy, N. Gligorijević, S. Arandelović, S. Radulović, G. Gasser, S. Grgurić-Šipka, Synthesis, characterization and biological evaluation of novel Ru(II)–arene complexes containing intercalating ligands, *J. Inorg. Biochem.* 2016, **160**, 156–165.
  8. M. Kubanik, H. Holtkamp, T. Söhnle, S. M. F. Jamieson, C. G. Hartinger, Impact of the Halogen Substitution Pattern on the Biological Activity of Organoruthenium 8-Hydroxyquinoline Anticancer Agents, *Organometallics*, 2015, **34**, 5658–5668.
  9. B. Kar, U. Das, S. De, S. Pete, A. Sharma, N. Roy, A. Kumar. SK, D. Panda, P. Paira, GSH resistant and highly cytoselective Ruthenium(II)-*p*-cymene-imidazo[4,5-f][1,10]phenanthroline-2-yl)phenol complexes as potential anticancer agent, *Dalton Trans.*, 2021, **50**, 10369-10373.
